# Supplementary material
Source: PubMed Central journal article supplement (PMC3969888)
Supplement: NIHMS523136-supplement-1_si_002.pdf [file NIHMS523136-supplement-1_si_002.pdf]

# Apratoxin H and Apratoxin A Sulfoxide from the Red Sea Cyanobacterium *Moorea producens*

Christopher C. Thornburg,<sup>†</sup> Elise S. Cowley,<sup>†</sup> Justyna Sikorska,<sup>†</sup> Lamiaa A.

Shaala,<sup>‡</sup> Jane E. Ishmael,<sup>†</sup> Daa T.A. Youssef,<sup>§</sup> and Kerry L. McPhail<sup>\*,†</sup>

<sup>†</sup>Department of Pharmaceutical Sciences, College of Pharmacy, Oregon State University, Corvallis, Oregon 97331, United States

<sup>‡</sup> Natural Products Unit, King Fahd Medical Research Center, King Abdulaziz University

<sup>§</sup>Department of Natural Products, Faculty of Pharmacy, King Abdulaziz University, Jeddah 21589, Saudi Arabia

---

**Contents**

---

- Table S1.** NMR Spectroscopic Data for Apratoxin H (**1**) in CDCl<sub>3</sub> (500 MHz)
- Table S2.** NMR Spectroscopic Data for Apratoxin A sulfoxide (**2**) in CDCl<sub>3</sub> (700 MHz)
- S3.** <sup>1</sup>H NMR spectrum for apratoxin H (**1**) in CDCl<sub>3</sub> (500 MHz)
- S4.** <sup>13</sup>C NMR spectrum for apratoxin H (**1**) in CDCl<sub>3</sub> (125 MHz)
- S5.** DQF COSY spectrum for apratoxin H (**1**) in CDCl<sub>3</sub> (500 MHz)
- S6.** Multiplicity-edited HSQC spectrum for apratoxin H (**1**) in CDCl<sub>3</sub> (500 MHz)
- S7.** HMBC spectrum for apratoxin H (**1**) in CDCl<sub>3</sub> (500 MHz)
- S8.** ROESY spectrum for apratoxin H (**1**) in CDCl<sub>3</sub> (500 MHz)
- S9.** <sup>1</sup>H NMR spectrum for apratoxin A sulfoxide (**2**) in CDCl<sub>3</sub> (700 MHz)
- S10.** <sup>13</sup>C NMR spectrum for apratoxin A sulfoxide (**2**) in CDCl<sub>3</sub> (175 MHz)
- S11.** COSY spectrum for apratoxin A sulfoxide (**2**) in CDCl<sub>3</sub> (700 MHz)
- S12.** Multiplicity-edited HSQC spectrum for apratoxin A sulfoxide (**2**) in CDCl<sub>3</sub> (700 MHz)
- S13.** HMBC spectrum for apratoxin A sulfoxide (**2**) in CDCl<sub>3</sub> (700 MHz)
- S14.** ROESY spectrum for apratoxin A sulfoxide (**2**) in CDCl<sub>3</sub> (700 MHz)
- S15.** <sup>1</sup>H NMR spectrum for apratoxin A in CDCl<sub>3</sub> (700 MHz)
- S16.** <sup>13</sup>C NMR spectrum for apratoxin A in CDCl<sub>3</sub> (175 MHz)
- S17.** Annotated MS/MS spectrum of apratoxin A
- S18.** Annotated MS/MS spectrum of apratoxin H (**1**)
- S19.** Annotated MS/MS spectrum of apratoxin A sulfoxide (**2**)
- S20.** Differential <sup>13</sup>C NMR chemical shifts of the polyketide moiety in apratoxin A versus: A) apratoxin H (**1**), and B) apratoxin A sulfoxide (**2**).
- S21.** CD spectra for apratoxins A, H (**1**) and apratoxin A sulfoxide (**2**).
- S22.** Concentration-response profiles for apratoxin A, apratoxin H (**1**) and apratoxin A sulfoxide (**2**) against human NCI-H460 lung cancer cells.
- S23.** Phylogenetic relationship of the apratoxin-producing cyanobacteria.
- S24.** Laboratory cultured *Moorea* sp. RS05 (JX470179) and corresponding photomicrographs.
-



**Table S1.** NMR Spectroscopic Data for Apratoxin H (**1**) in CDCl<sub>3</sub> (500 MHz).

| unit             | position         | $\delta_C$ , mult.     | $\delta_H$ ( $J$ in Hz) <sup>a</sup> | COSY                     | HMBC                                    | ROESY                                           |                                               |
|------------------|------------------|------------------------|--------------------------------------|--------------------------|-----------------------------------------|-------------------------------------------------|-----------------------------------------------|
| Pip              | 1                | 172.2, C               |                                      |                          |                                         |                                                 |                                               |
|                  | 2                | 54.4, CH               | 4.60, dd (7.0, 3.6)                  | H-3a, H-3b               | 1, 3, 4, 6                              | H-3a, H-3b                                      |                                               |
|                  | 3a               | 25.7, CH <sub>2</sub>  | 1.82, m                              | H-2, H-3b                |                                         | H-2                                             |                                               |
|                  | 3b               |                        | 2.03, m                              | H-2, H-3a                | 1, 5                                    | H-2, H <sub>3</sub> -42/43/44                   |                                               |
|                  | 4a               | 19.2, CH <sub>2</sub>  | 1.36, m                              | H-4b                     |                                         | H-4b                                            |                                               |
|                  | 4b               |                        | 1.62, m                              | H-4a                     | 1, 5                                    | H-4a                                            |                                               |
|                  | 5a               | 24.3, CH <sub>2</sub>  | 1.56, m                              | H-5a, H-6b               |                                         | H-5b                                            |                                               |
|                  | 5b               |                        | 1.82, m                              | H-5b, H-6b               | 6 (w) <sup>c</sup>                      | H-5a, H-6a                                      |                                               |
|                  | 6a               | 43.1, CH <sub>2</sub>  | 3.50, m                              | H-5a, H-5b, H-6b         | 4 (w) <sup>c</sup> , 5 (w) <sup>c</sup> | H-5b                                            |                                               |
|                  | 6b               |                        | 4.35, m                              | H-6a                     | 4, 5                                    | H-8                                             |                                               |
|                  | <i>N</i> -Me-Ile | 7                      | 169.7, C                             |                          |                                         |                                                 |                                               |
|                  |                  | 8                      | 54.4, CH                             | 5.48, d (11.5)           | H-9                                     | 7, 9                                            | H-6a, H <sub>3</sub> -12, H <sub>3</sub> -13  |
|                  |                  | 9                      | 31.8, CH                             | 2.29, m                  | H-8, H-10b, H <sub>3</sub> -12          | 11                                              | H-10b, H <sub>3</sub> -12, H <sub>3</sub> -13 |
| 10a              |                  | 24.6, CH <sub>2</sub>  | 0.99, m                              | H-9, H <sub>3</sub> -11  | 8, 11, 12                               | H-10b, H-9                                      |                                               |
| 10b              |                  |                        | 1.33, m                              | H-9, H <sub>3</sub> -11  |                                         | H-10a, H <sub>3</sub> -13                       |                                               |
| 11               |                  | 9.0, CH <sub>3</sub>   | 0.91, ob                             | H-10b                    |                                         |                                                 |                                               |
| 12               |                  | 14.5, CH <sub>3</sub>  | 0.92, ob                             | H-9                      | 8                                       | H-8, H-9                                        |                                               |
| 13               |                  | 30.4, CH <sub>3</sub>  | 2.71, s                              |                          | 8, 14                                   | H-8, H-9, H-10b, H-15, H-19, OH                 |                                               |
| <i>N</i> -Me-Ala |                  | 14                     | 169.6 <sup>b</sup> , C               |                          |                                         |                                                 |                                               |
|                  |                  | 15                     | 60.8, CH                             | 3.31, br m               | H <sub>3</sub> -16                      |                                                 | H <sub>3</sub> -13, H <sub>3</sub> -17        |
|                  | 16               | 14.0, CH <sub>3</sub>  | 1.25, d (6.7)                        | H-15                     | 14, 15                                  | H <sub>3</sub> -17                              |                                               |
|                  | 17               | 36.7, CH <sub>3</sub>  | 2.79, s                              |                          | 15, 18                                  | H-15, H <sub>3</sub> -16, H-19, H-22/26         |                                               |
| <i>O</i> -Me-Tyr | 18               | 170.5, C               |                                      |                          |                                         |                                                 |                                               |
|                  | 19               | 50.6, CH               | 5.06, ddd (10.9, 9.5, 4.8)           | H-20a, H-20b, NH         | 18, 20, 21                              | H <sub>3</sub> -17, H-20a, NH                   |                                               |
|                  | 20a              | 37.3, CH <sub>2</sub>  | 2.88, dd (-12.4, 4.8)                | H-19, H-20b              | 18, 19, 21, 22/26                       | H-20b, H-22/26                                  |                                               |
|                  | 20b              |                        | 3.14, dd (-12.4, 4.8)                | H-19, H-20a              | 18, 19, 21, 22/26                       | H-20a, H-22/26                                  |                                               |
|                  | 21               | 128.3, C               |                                      |                          |                                         |                                                 |                                               |
|                  | 22/26            | 130.6, CH              | 7.17, d (8.5)                        | H-23/25                  | 22/26, 23/25, 24                        | H <sub>3</sub> -17, H-19, H-20a, H-20b, H-23/25 |                                               |
|                  | 23/25            | 113.9, CH              | 6.82, d (8.6)                        | H-22/26                  | 21, 23/25, 24                           | H-22/26, H <sub>3</sub> -27                     |                                               |
|                  | 24               | 158.7, C               |                                      |                          |                                         |                                                 |                                               |
|                  | 27               | 55.3, CH <sub>3</sub>  | 3.79, s                              |                          | 24                                      | H-23/25                                         |                                               |
|                  | NH               |                        | 6.05, d (9.4)                        | H-19                     | 28                                      | H-19, H <sub>3</sub> -33                        |                                               |
| moCys            | 28               | 169.6 <sup>b</sup> , C |                                      |                          |                                         |                                                 |                                               |
|                  | 29               | 130.5, C               |                                      |                          |                                         |                                                 |                                               |
|                  | 30               | 136.4, CH              | 6.36, br d (9.6)                     | H-31, H <sub>3</sub> -33 | 28, 32, 33                              | H-31, H-32a, H-35                               |                                               |
|                  | 31               | 72.6, CH               | 5.23, ddd (9.4, 9.1, 4.5)            | H-30, H-32a, H-32b       | 29, 30                                  | H-30, H-32b, H <sub>3</sub> -33                 |                                               |
|                  | 32a              | 37.6, CH <sub>2</sub>  | 3.13, dd (-10.9, 4.7)                | H-31, H-32b              | 29, 31, 34                              | H-30, H-32b                                     |                                               |
|                  | 32b              |                        | 3.47, dd (-10.9, 8.7)                | H-31, H-32a              | 30, 31, 34                              | H-31, H-32a                                     |                                               |
|                  | 33               | 13.4, CH <sub>3</sub>  | 1.97, s                              | H-30                     | 28, 29, 30, 31d, 32                     | H-31, NH                                        |                                               |
| polyketide       | 34               | 177.1, C               |                                      |                          |                                         |                                                 |                                               |
|                  | 35               | 48.8, CH               | 2.65, ob                             | H-36, H <sub>3</sub> -45 | 34, 36, 45                              | H-30, H-36, H-37b, H <sub>3</sub> -45           |                                               |
|                  | 36               | 71.7, CH               | 3.56, dddd (10.9, 10.6, 10.4, 3.0)   | H-35, H-37a, H-37b, OH   |                                         | H-35, H <sub>3</sub> -45, H <sub>3</sub> -46    |                                               |
|                  | 37a              | 38.5, CH <sub>2</sub>  | 1.11, ddd (-13.8, 10.9, 3.0)         | H-36, H-37b, H-38        | 38                                      | H-37b, H-38                                     |                                               |
|                  | 37b              |                        | 1.46, ddd (-13.7, 11.1, 4.0)         | H-36, H-37a              | 35, 36, 38, 46                          | H-35, H-37a, H-38, H-40                         |                                               |

|          |                           |                      |                                     |                  |                                               |
|----------|---------------------------|----------------------|-------------------------------------|------------------|-----------------------------------------------|
| 38       | 24.5, CH                  | 2.11, br m           | H-37a, H-39a,<br>H <sub>3</sub> -46 |                  | H-37a, H-37b, H-39b, H <sub>3</sub> -46, OH   |
| 39a      | 37.8, CH <sub>2</sub>     | 1.26, ob             | H-38, H-39b, H-40                   | 38               | H-39b, H-40, H <sub>3</sub> -42/43/44         |
| 39b      |                           | 1.79, m              | H-39a, H-40                         | 37, 38, 40       | H-38, H-39a, H-40, H <sub>3</sub> -42/43/44   |
| 40       | 77.4, CH                  | 4.90, dd (12.7, 2.2) | H-39a, H-39b                        | 1, 39, 42/43/44  | H-37b, H-39a, H-39b, H <sub>3</sub> -42/43/44 |
| 41       | 34.9, C                   |                      |                                     |                  |                                               |
| 42/43/44 | 3 × 26.1, CH <sub>3</sub> | 3 × 0.89, s          |                                     | 40, 41, 42/43/44 | H-3b, H-39a, H-39b, H-40                      |
| 45       | 16.7, CH <sub>3</sub>     | 1.06, d (6.9)        | H-35                                | 34, 35, 36       | H-35, H-36                                    |
| 46       | 19.9, CH <sub>3</sub>     | 1.01, d (6.7)        | H-38                                | 36d, 37, 38, 39  | H-36, H-38                                    |
| OH       |                           | 4.40, d (10.9)       | H-36                                | 36               | H <sub>3</sub> -13, H-38                      |

<sup>a</sup> *J* values obtained from <sup>1</sup>H spectrum recorded at 700 MHz. <sup>b</sup> These carbons have the same chemical shift. <sup>c</sup>(w) indicates a weak correlation. <sup>d</sup> Four-bond HMBC correlation. ob = obscured.

**Table S2.** NMR Spectroscopic Data for Apratoxin A sulfoxide (**2**) in CDCl<sub>3</sub> (700 MHz).

| unit             | position | $\delta_C$ , mult.    | $\delta_H$ ( <i>J</i> in Hz)      | COSY                                    | HMBC                 | ROESY                                                      |
|------------------|----------|-----------------------|-----------------------------------|-----------------------------------------|----------------------|------------------------------------------------------------|
| Pro              | 1        | 172.6, C              |                                   |                                         |                      |                                                            |
|                  | 2        | 59.8, CH              | 4.22, br t (7.4)                  | H-3a, H-3b                              | 1, 3                 | H-3a, H-3b, H-4b                                           |
|                  | 3a       | 29.5, CH <sub>2</sub> | 1.90, m                           | H-2, H-3b                               | 1, 4                 | H-2                                                        |
|                  | 3b       |                       | 2.26, m                           | H-2, H-3a                               | 1, 4, 5              | H-2                                                        |
|                  | 4a       | 25.7, CH <sub>2</sub> | 1.92, m                           | H-5a, H-5b                              |                      | H-5b                                                       |
|                  | 4b       |                       | 2.06, m                           | H-5a, H-5b                              | 2, 3                 | H-2, H-5b                                                  |
|                  | 5a       | 48.0, CH <sub>2</sub> | 3.69, m                           | H-4a, H-4b, H-5b                        | 3, 4                 | H-5b, H-7                                                  |
|                  | 5b       |                       | 4.18, m                           | H-4a, H-4b, H-5a                        | 3, 4                 | H-4a, H-4b, H-5a, H-7                                      |
| <i>N</i> -Me-Ile | 6        | 170.5, C              |                                   |                                         |                      |                                                            |
|                  | 7        | 57.3, CH              | 5.23, d (11.5)                    | H-8                                     | 6, 8                 | H-5a, H-5b, H-8, H <sub>3</sub> -12                        |
|                  | 8        | 32.2, CH              | 2.18, m                           | H-7 H <sub>3</sub> -11                  | 11                   | H-7, H <sub>3</sub> -11, H <sub>3</sub> -12                |
|                  | 9a       | 25.0, CH <sub>2</sub> | 0.99, m                           | H-9b                                    | 10, 11               | H-9b                                                       |
|                  | 9b       |                       | 1.36, m                           | H-9a, H <sub>3</sub> -10                |                      | H-9a, H <sub>3</sub> -10                                   |
|                  | 10       | 9.6, CH <sub>3</sub>  | 0.95, d (7.5)                     | H-9b                                    | 8, 9                 | H-9b                                                       |
|                  | 11       | 14.5, CH <sub>3</sub> | 0.97, d (7.3)                     | H-8                                     | 7, 8, 9              | H-8                                                        |
|                  | 12       | 30.5, CH <sub>3</sub> | 2.66, s                           |                                         | 7, 13                | H-7, H-8, H-14, H-29, OH                                   |
| <i>N</i> -Me-Ala | 13       | 170.2, C              |                                   |                                         |                      |                                                            |
|                  | 14       | 60.8, CH              | 3.31, m                           | H <sub>3</sub> -15                      | 13, 15               | H <sub>3</sub> -12, H <sub>3</sub> -15, H <sub>3</sub> -16 |
|                  | 15       | 14.1, CH <sub>3</sub> | 1.23, d (6.6)                     | H-14                                    | 13, 14               | H-14, H <sub>3</sub> -16                                   |
|                  | 16       | 36.9, CH <sub>3</sub> | 2.82, s                           |                                         | 14, 17               | H-14, H-18, H <sub>3</sub> -15, OH                         |
| <i>O</i> -Me-Tyr | 17       | 170.5, C              |                                   |                                         |                      |                                                            |
|                  | 18       | 50.8, CH              | 5.05, m                           | H-19a, H-19b, NH                        | 17, 19               | H <sub>3</sub> -16, H-19a, H-19b, H-21/25, NH              |
|                  | 19a      | 37.2, CH <sub>2</sub> | 2.88, dd (-12.5, 4.5)             | H-18, H-19b                             | 17, 18, 20, 21/25    | H-18, H-19b                                                |
|                  | 19b      |                       | 3.14, m                           | H-18, H-19a                             | 17, 18, 20, 21/25    | H-18, H-19a, NH                                            |
|                  | 20       | 128.4, C              |                                   |                                         |                      |                                                            |
|                  | 21/25    | 130.8, CH             | 7.17, d (8.5)                     | H-22/24                                 | 19, 21/25, 22/24, 23 | H-18, H <sub>3</sub> -26                                   |
|                  | 22/24    | 114.1, CH             | 6.80, d (8.5)                     | H-21/25                                 | 20, 22/24, 23        | H <sub>3</sub> -26                                         |
|                  | 23       | 158.9, C              |                                   |                                         |                      |                                                            |
|                  | 26       | 55.5, CH <sub>3</sub> | 3.79, s                           |                                         | 23                   | H-21/25, H-22/24                                           |
|                  | NH       |                       | 6.05, d (9.5)                     | H-18                                    | 27                   | H-18, H-19b, H <sub>3</sub> -32                            |
| moCys            | 27       | 169.5, C              |                                   |                                         |                      |                                                            |
|                  | 28       | 133.8, C              |                                   |                                         |                      |                                                            |
|                  | 29       | 135.0                 | 5.90, d (9.9)                     | H-30, H <sub>3</sub> -32                | 27, 30, 31, 32       | H <sub>3</sub> -12, H-30, H-31a, H-32                      |
|                  | 30       | 71.8, CH              | 5.70, m                           | H-29, H-31a, H-31b                      | 28, 29, 31, 33       | H-29, H-31a, H-31b                                         |
|                  | 31a      | 57.0, CH <sub>2</sub> | 2.78, dd (-13.9, 5.7)             | H-30, H-31b                             | 29, 30, 33           | H-29, H-30, H-31b                                          |
|                  | 31b      |                       | 3.32, dd (-14.0, 5.9)             | H-31a                                   | 29, 33               | H-30, H-31a                                                |
|                  | 32       | 13.6, CH <sub>3</sub> | 2.0, s                            | H-29                                    | 27, 28, 29           | H-29, H-30, NH                                             |
| polyketide       | 33       | 177.2, C              |                                   |                                         |                      |                                                            |
|                  | 34       | 48.7, CH              | 2.84, dq (10.5, 7.0)              | H-35, H <sub>3</sub> -44                | 33, 35, 44           | H-35, H-36b, H <sub>3</sub> -44, OH                        |
|                  | 35       | 70.8, CH              | 3.89, dddd (11.1, 0.8, 10.5, 3.5) | H-34, H-36a, H-36b, OH                  |                      | H-34, H-36a H <sub>3</sub> -44, H <sub>3</sub> -45, OH     |
|                  | 36a      | 37.9, CH <sub>2</sub> | 1.24, m                           | H-35, H-36b, H-37                       | 38                   | H-35, H-36b                                                |
|                  | 36b      |                       | 1.61, m                           | H-35, H-36a, H-37                       | 34, 36, 45           | H-34, H-36a, H-39, OH                                      |
|                  | 37       | 24.7, CH              | 2.12, m                           | H-36a, H-36b, H-38b, H <sub>3</sub> -45 |                      | H-39, H <sub>3</sub> -45                                   |
|                  | 38a      | 37.6, CH <sub>2</sub> | 1.31, ob                          | H-38b, H-39                             | 37                   | H-38b, H-39                                                |
|                  | 38b      |                       | 1.82, m                           | H-37, H-38a                             | 36                   | H-38a, H-39                                                |
|                  | 39       | 77.7, CH              | 4.98, dd (12.6, 2.2)              | H-38a                                   | 1, 40, 41/42/43      | H-36b, H-37, H-38a,                                        |

|          |                              |                |      |  |                  |                                                                    |
|----------|------------------------------|----------------|------|--|------------------|--------------------------------------------------------------------|
|          |                              |                |      |  |                  | H-38b, H <sub>3</sub> -41/42/43                                    |
| 40       | 35.1, C                      |                |      |  |                  |                                                                    |
| 41/42/43 | 3 × 26.3,<br>CH <sub>3</sub> | 3 × 0.89, s    |      |  | 39, 40, 41/42/43 | H-39                                                               |
| 44       | 15.7, CH <sub>3</sub>        | 1.35, d (7.0)  | H-34 |  | 33, 34, 35       | H-34, H-35                                                         |
| 45       | 20.0, CH <sub>3</sub>        | 1.01, d (6.5)  | H-37 |  | 37, 38           | H-35, H-37                                                         |
| OH       |                              | 4.65, d (11.5) | H-35 |  | 35               | H <sub>3</sub> -12, H <sub>3</sub> -16, H-34,<br>H-35, H-36b, H-37 |

ob = obscured.





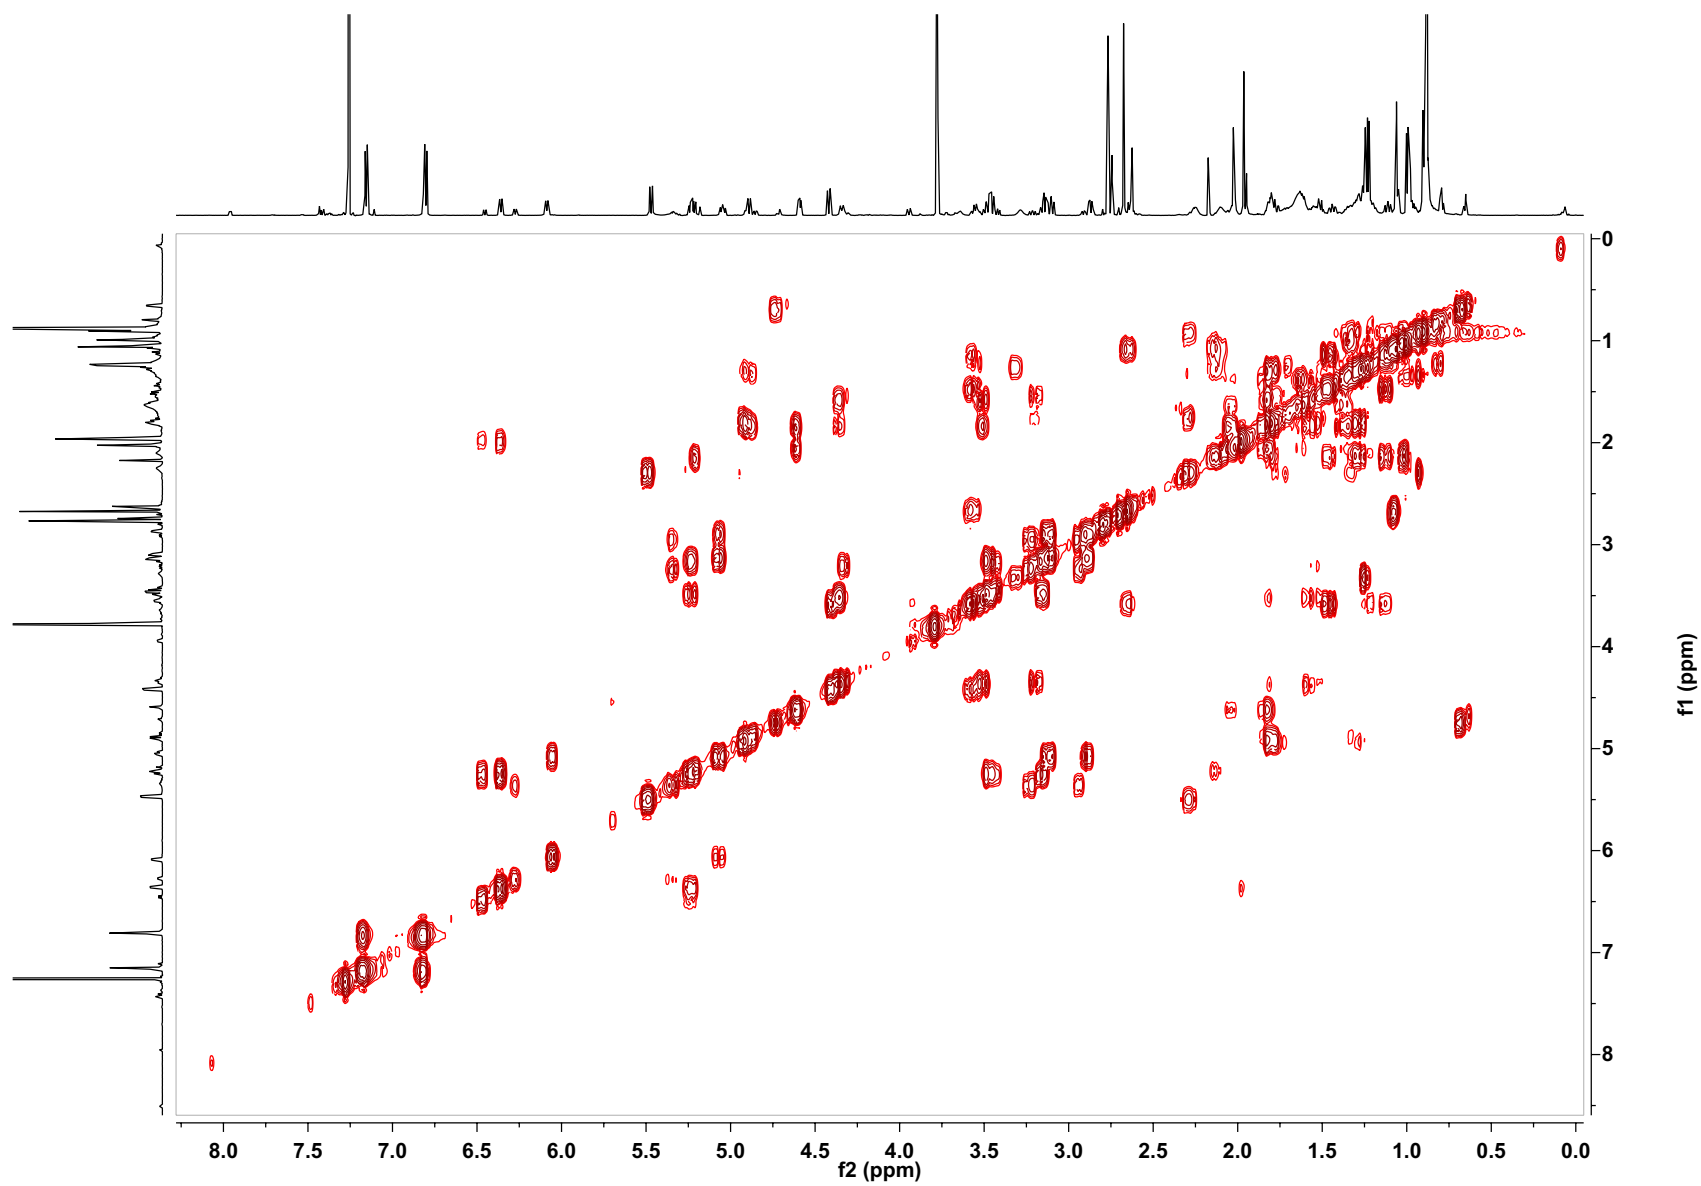

S5. DQF COSY spectrum for apratoxin H (**1**) in  $\text{CDCl}_3$  (500 MHz)

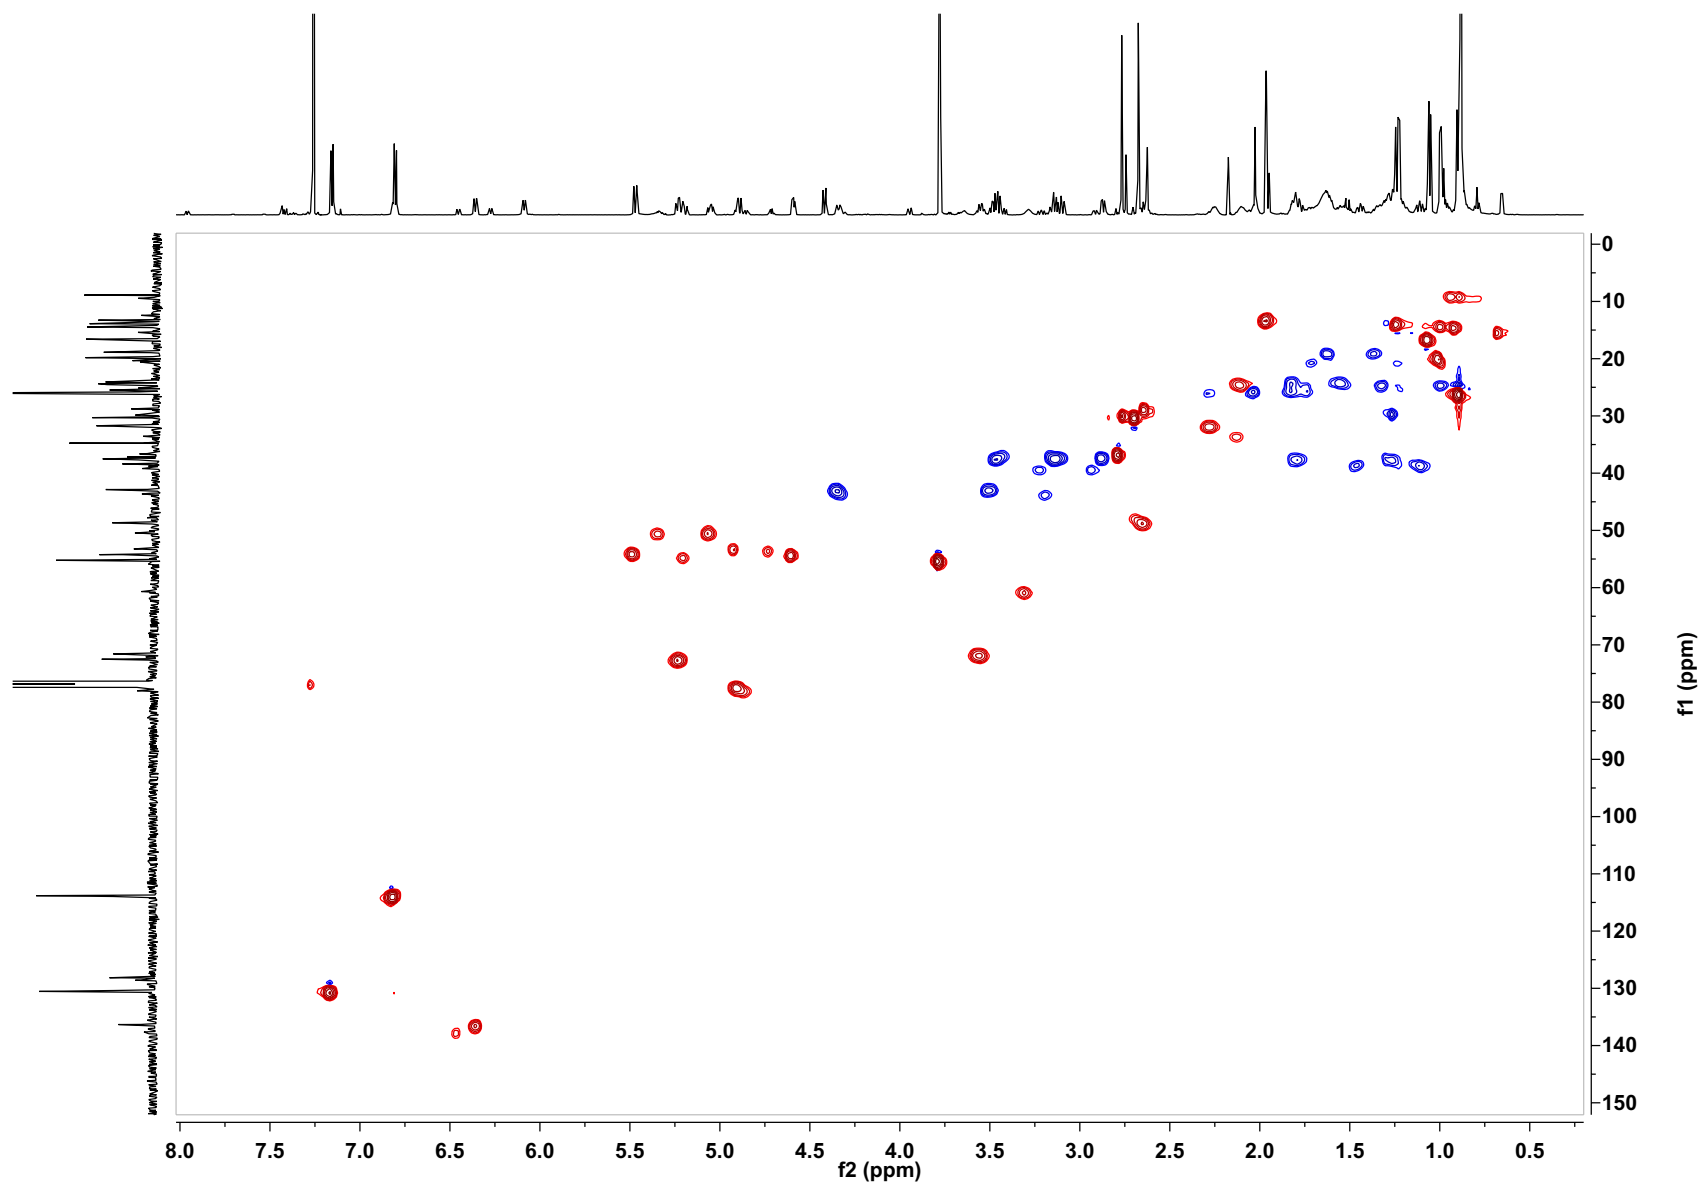

S.6. Multiplicity-edited HSQC spectrum for apratoxin H (**1**) in  $\text{CDCl}_3$  (500 MHz)



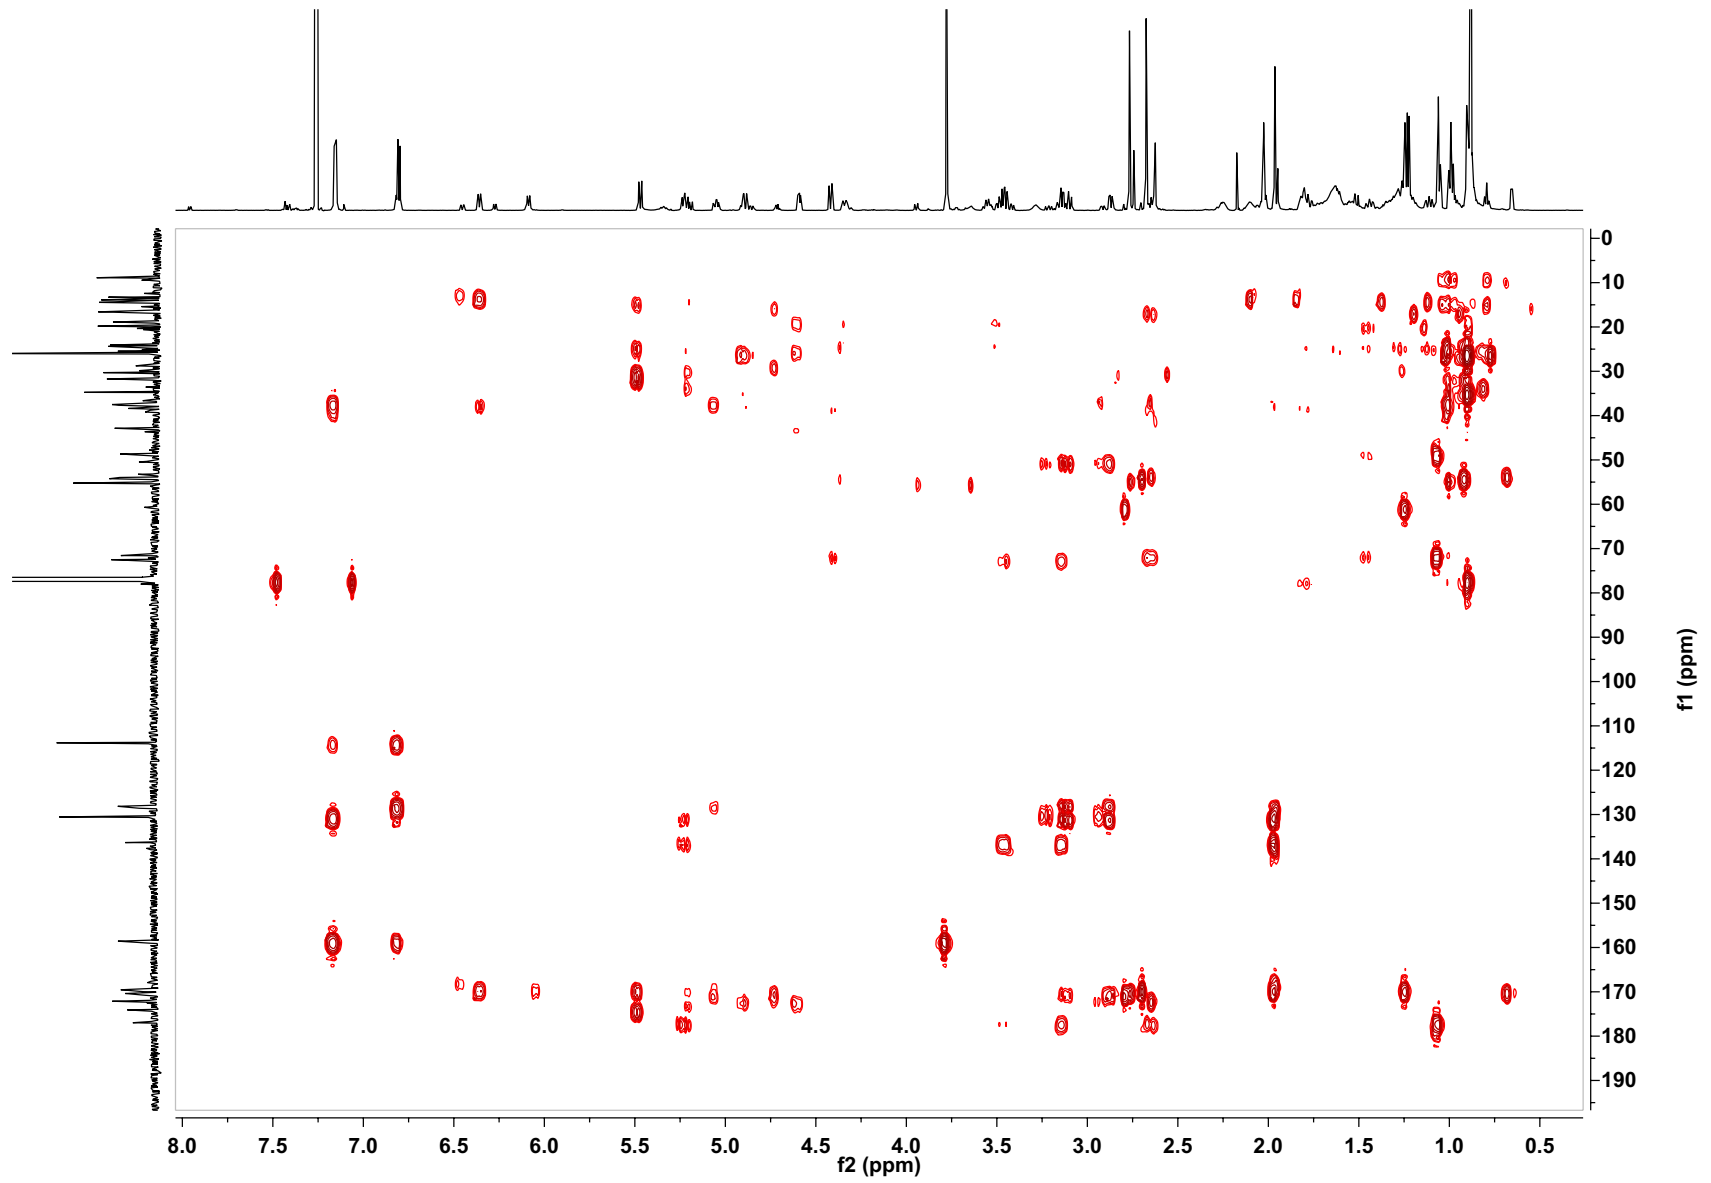

S7. HMBC spectrum for apratoxin H (1) in CDCl<sub>3</sub> (500 MHz)

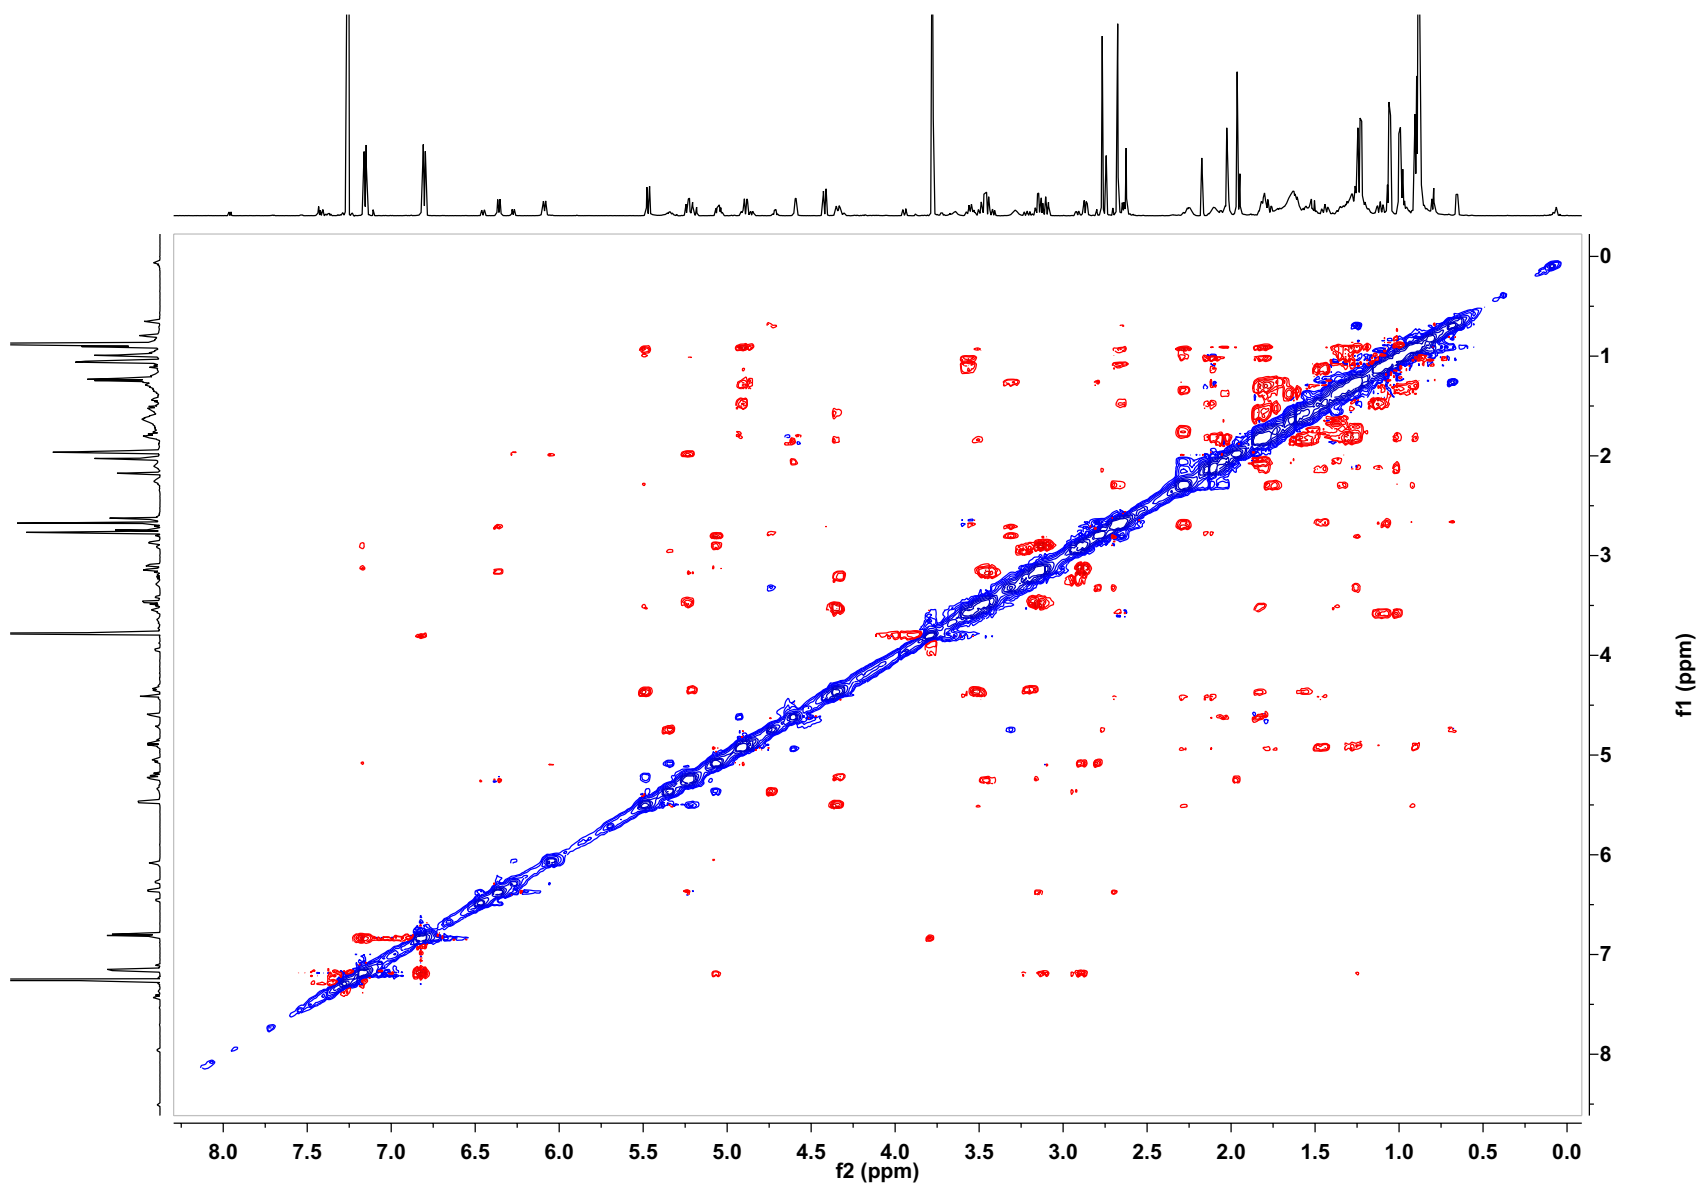

S8. ROESY spectrum for apratoxin H (1) in CDCl<sub>3</sub> (500 MHz)





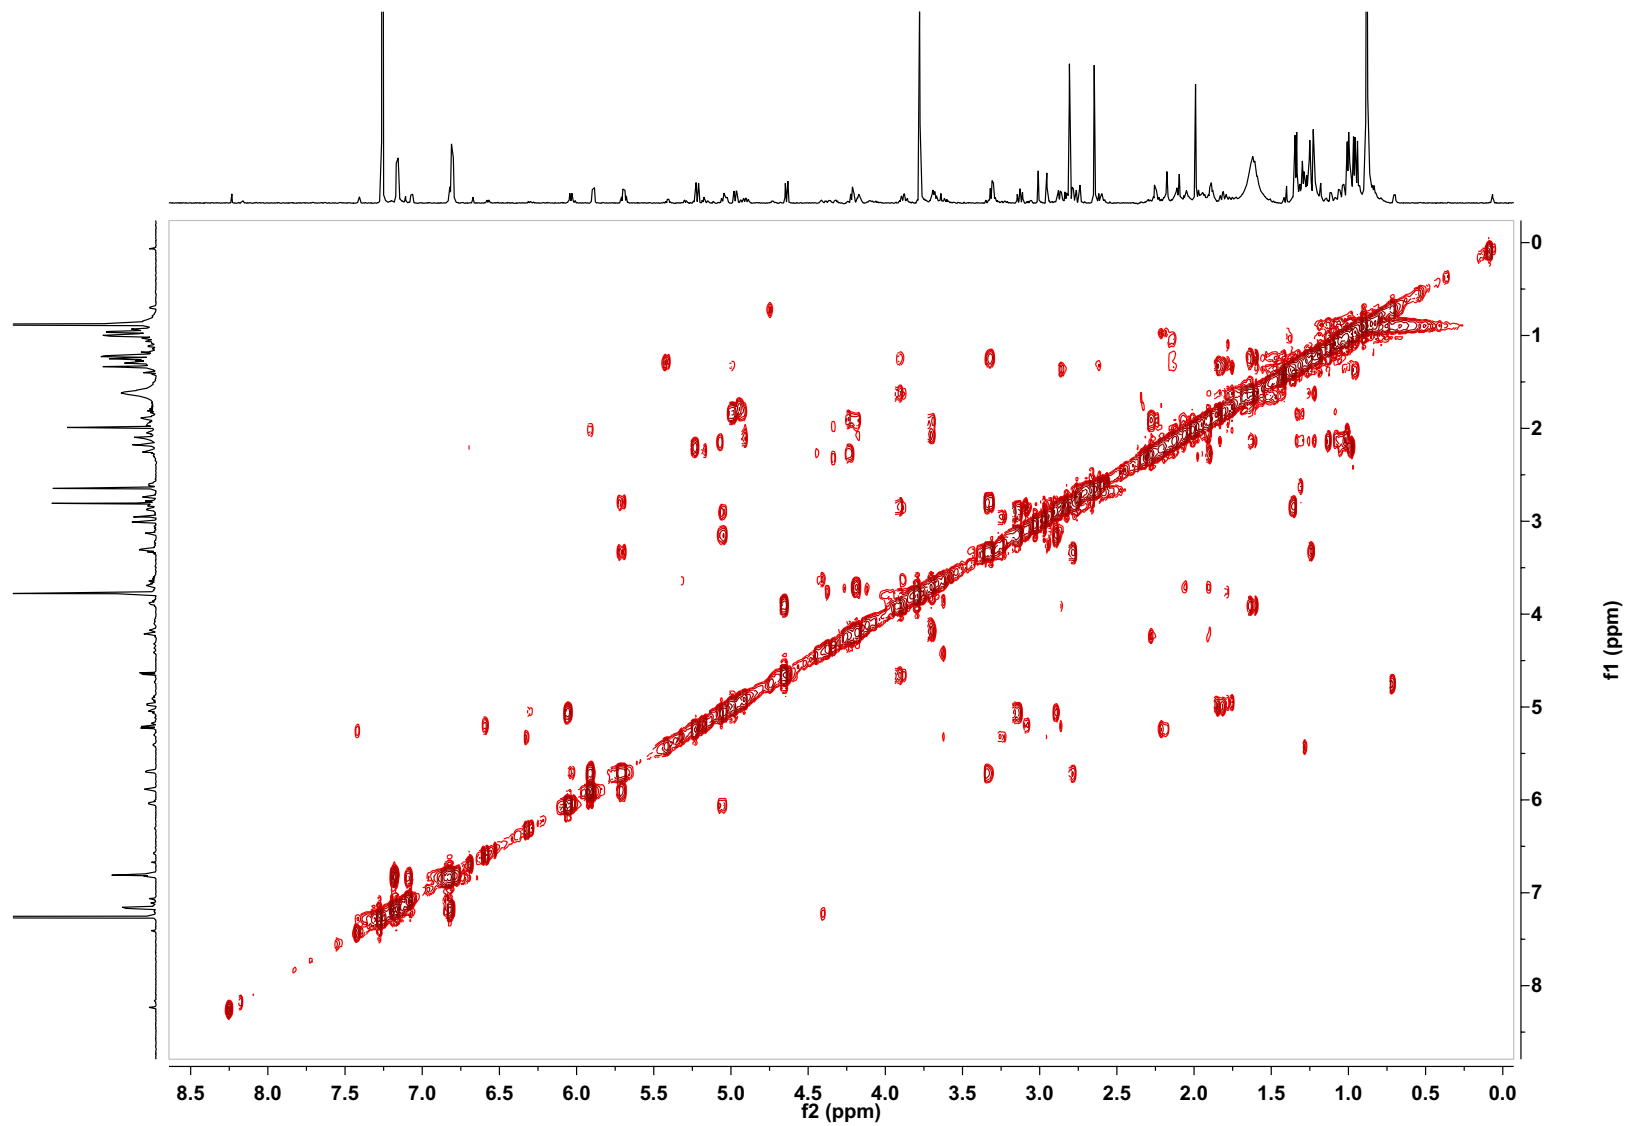

S11. COSY spectrum for apratoxin A sulfoxide (**2**) in CDCl<sub>3</sub> (700 MHz)

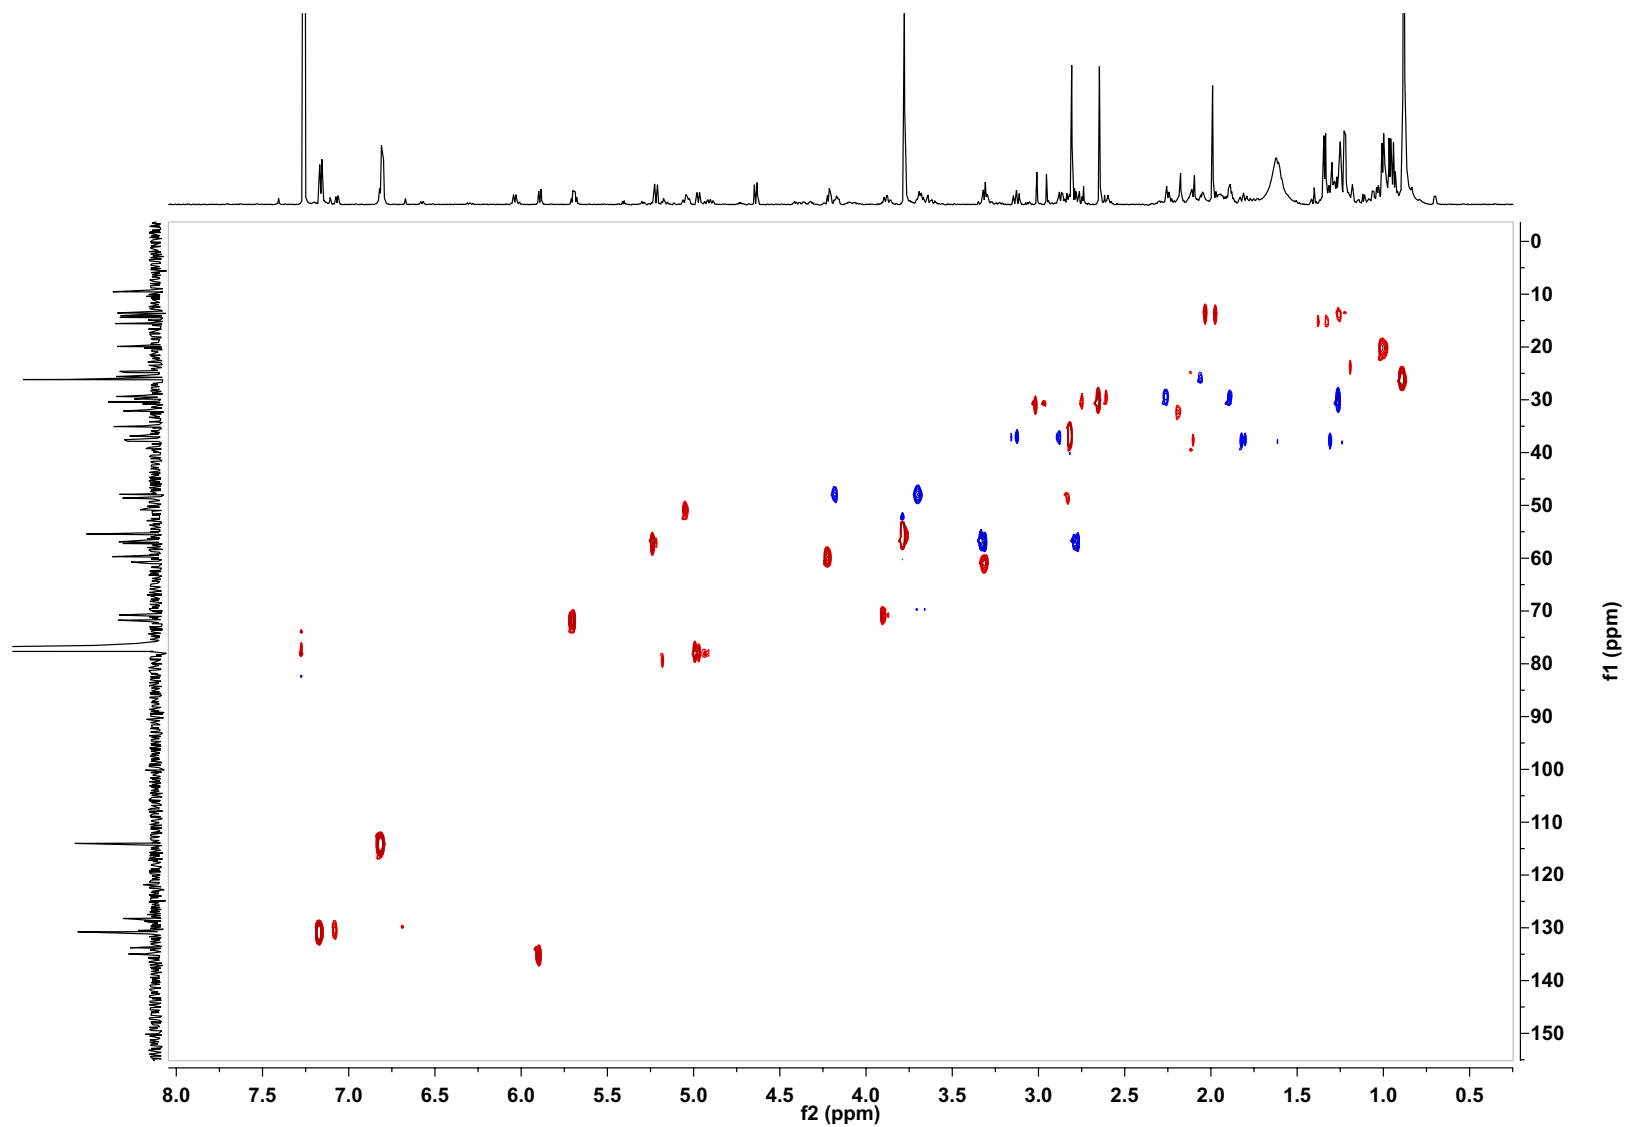

S12. Multiplicity-edited HSQC spectrum for apratoxin A sulfoxide (2) in CDCl<sub>3</sub> (700 MHz)

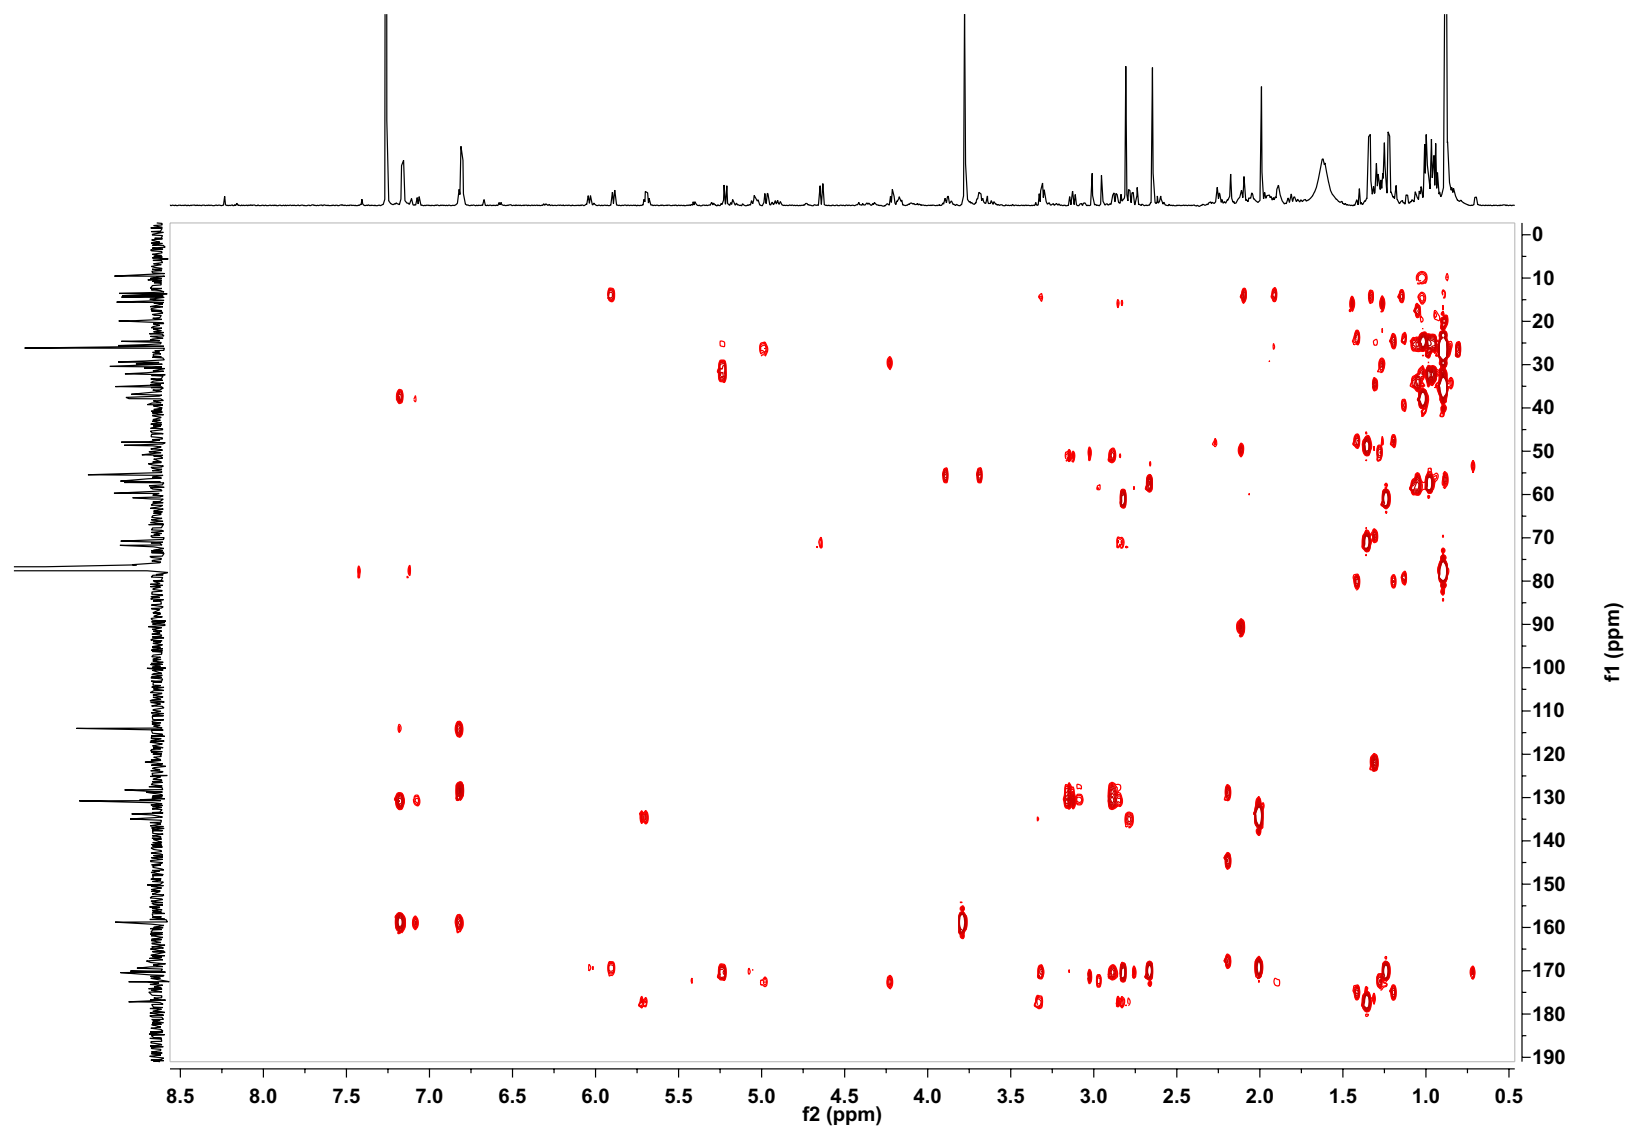

S13. HMBC spectrum for apratoxin A sulfoxide (2) in CDCl<sub>3</sub> (700 MHz)

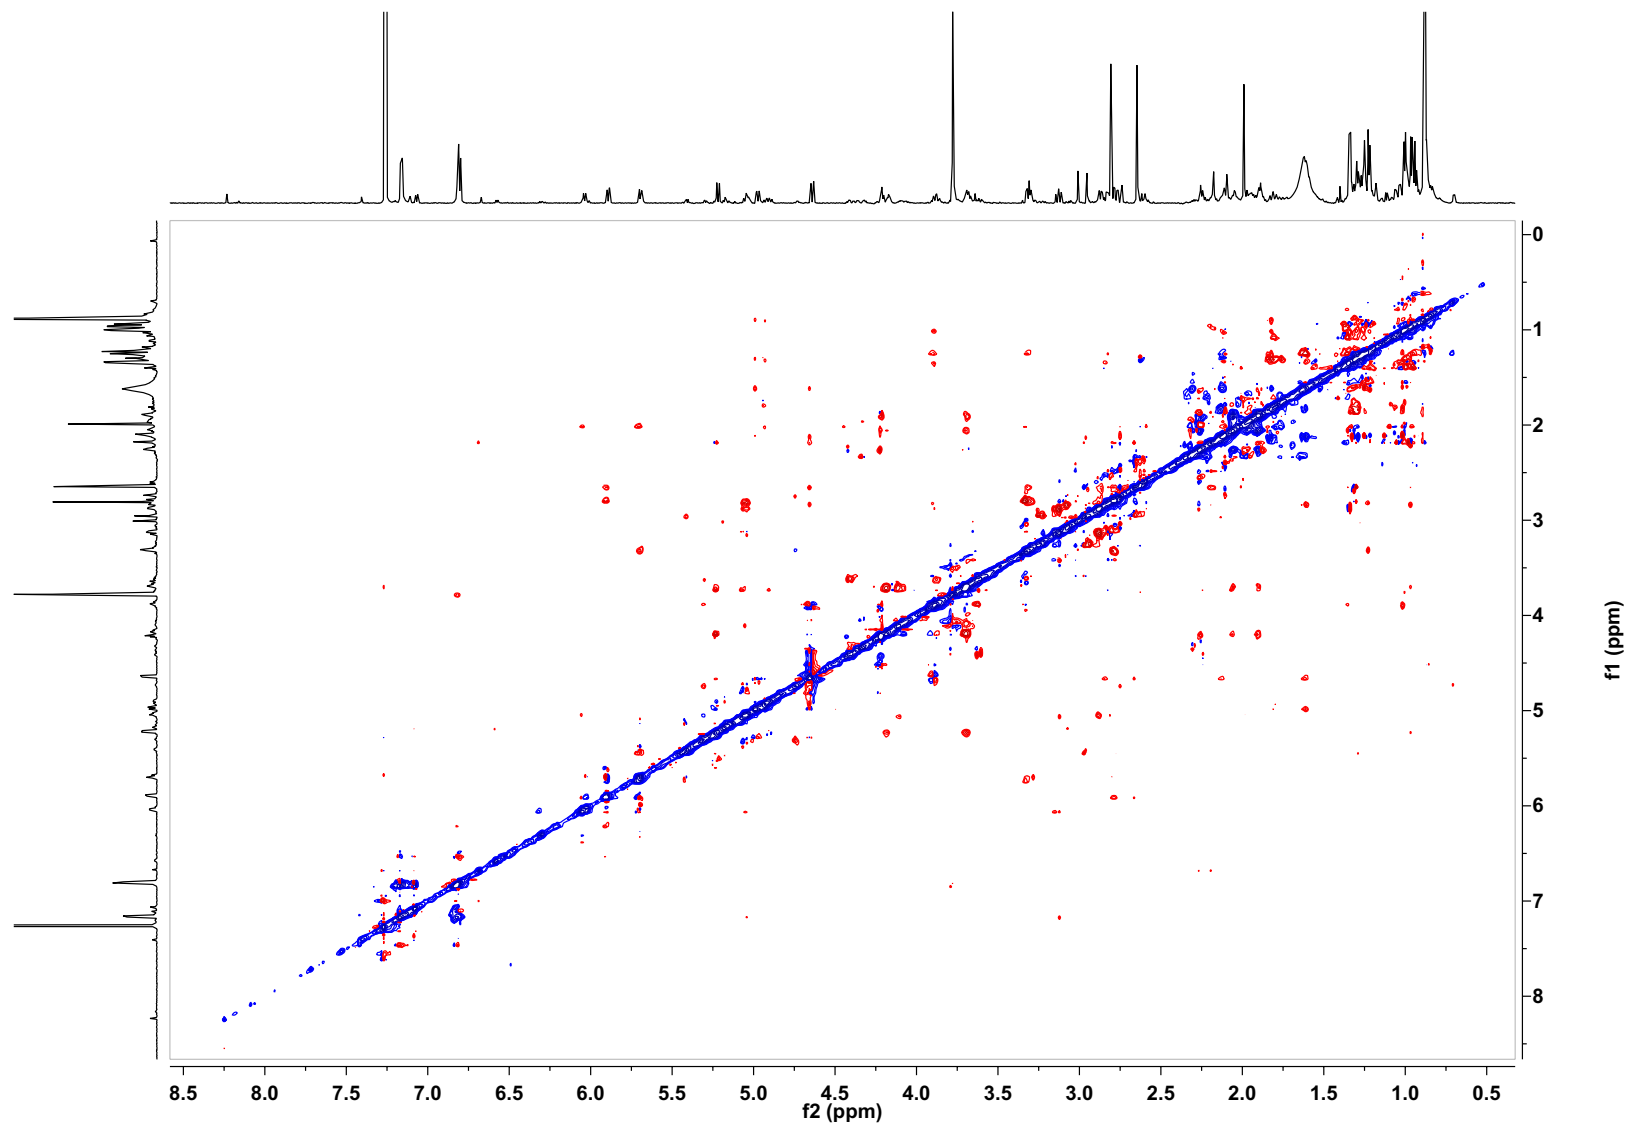

S14. ROESY spectrum for apratoxin A sulfoxide (**2**) in CDCl<sub>3</sub> (700 MHz)



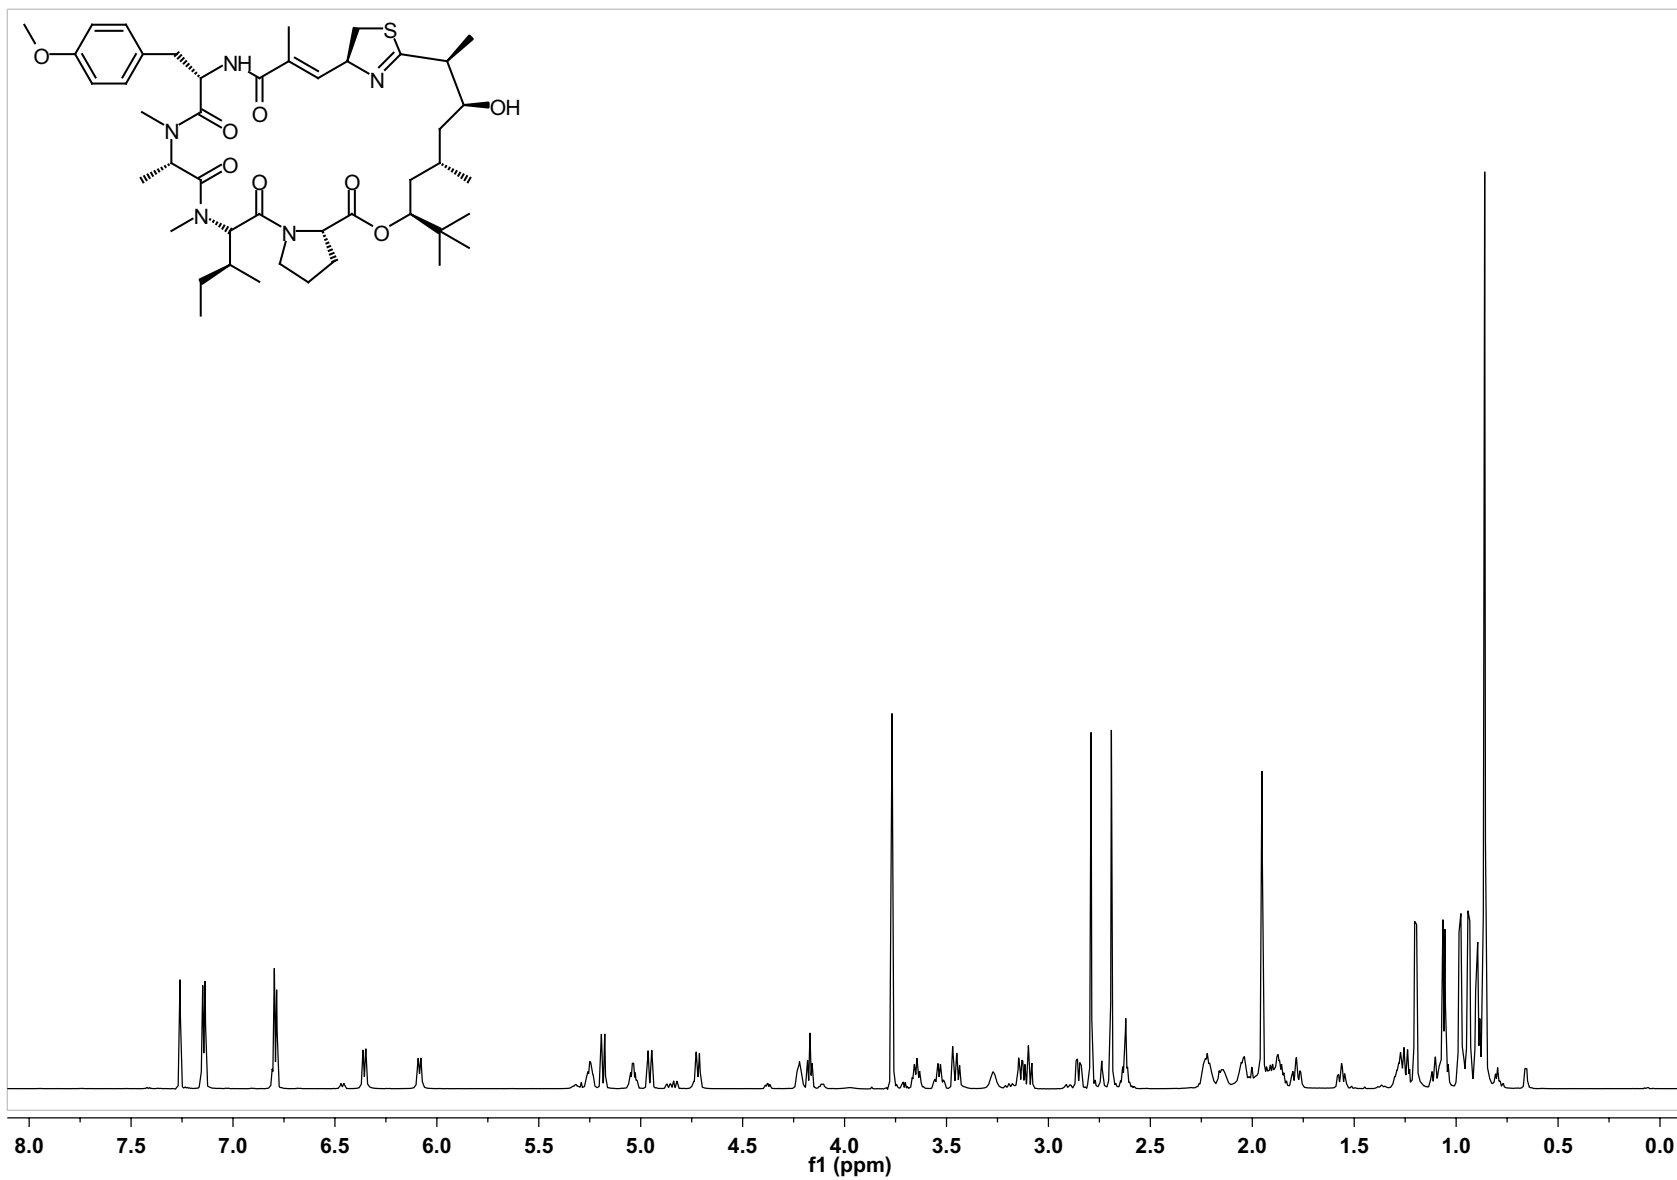

S15.  $^1\text{H}$  NMR spectrum for apratoxin A in  $\text{CDCl}_3$  (700 MHz)

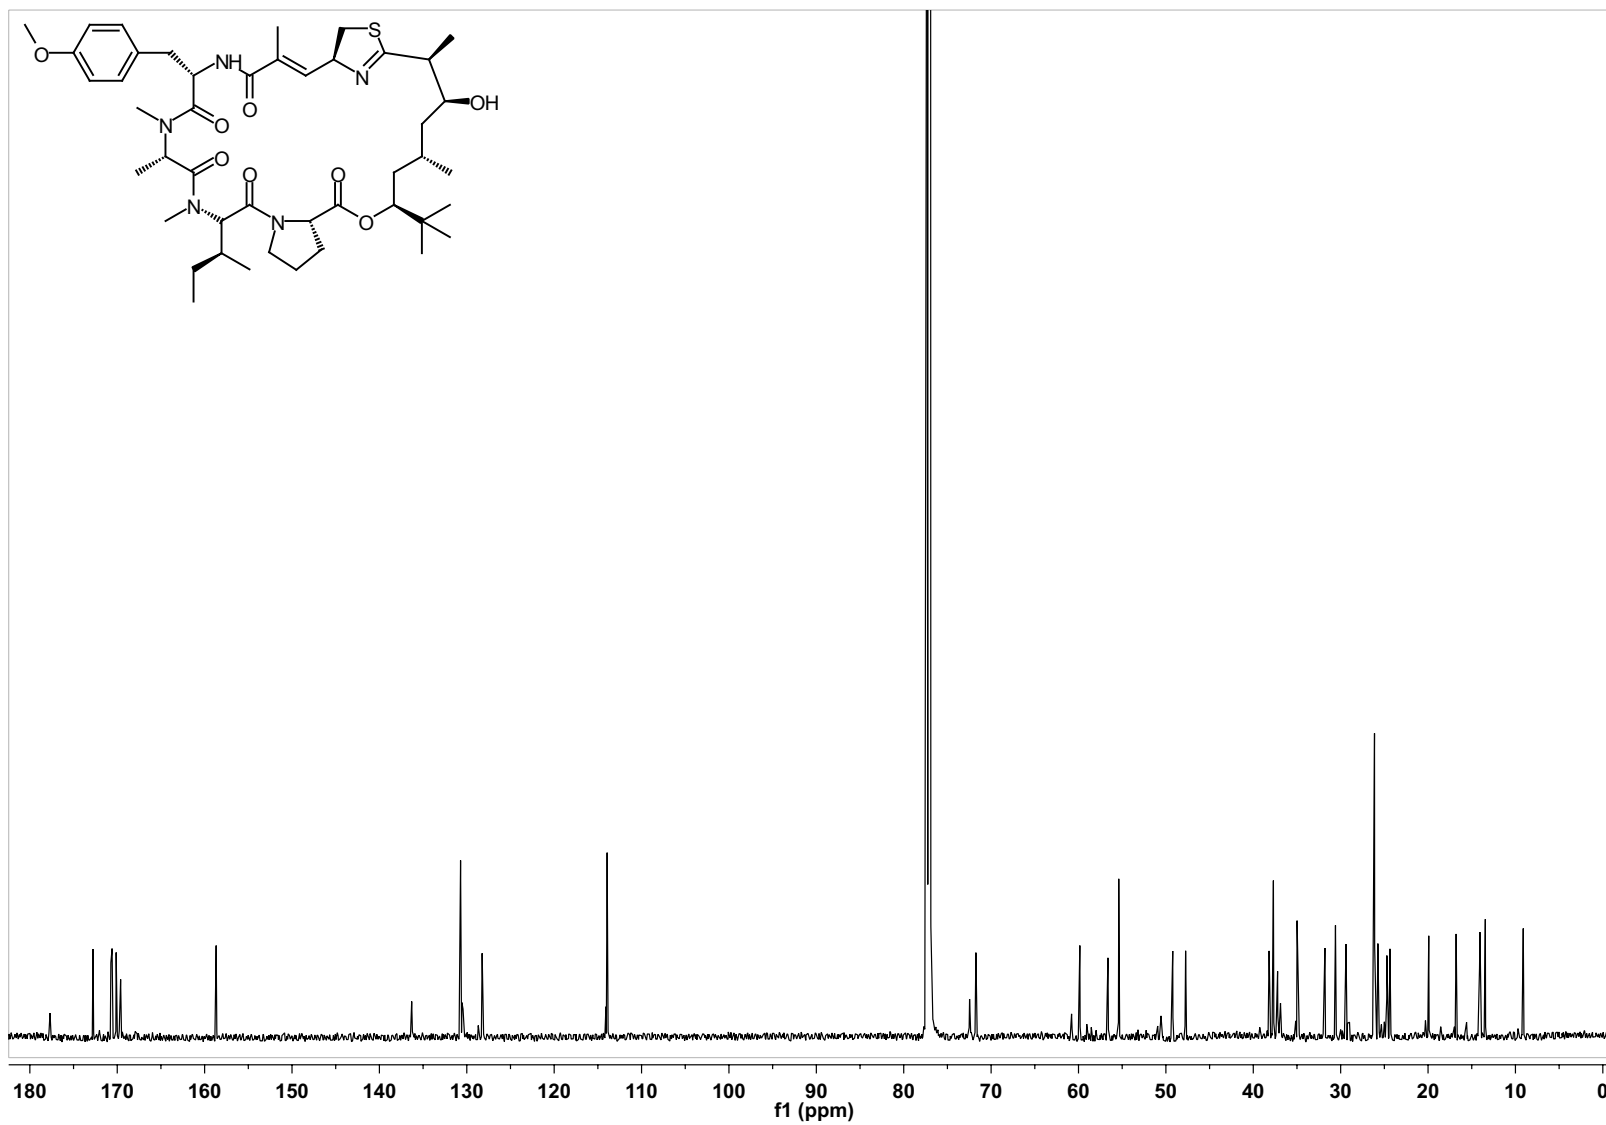

S16. <sup>13</sup>C NMR spectrum for apratoxin A in CDCl<sub>3</sub> (175 MHz)

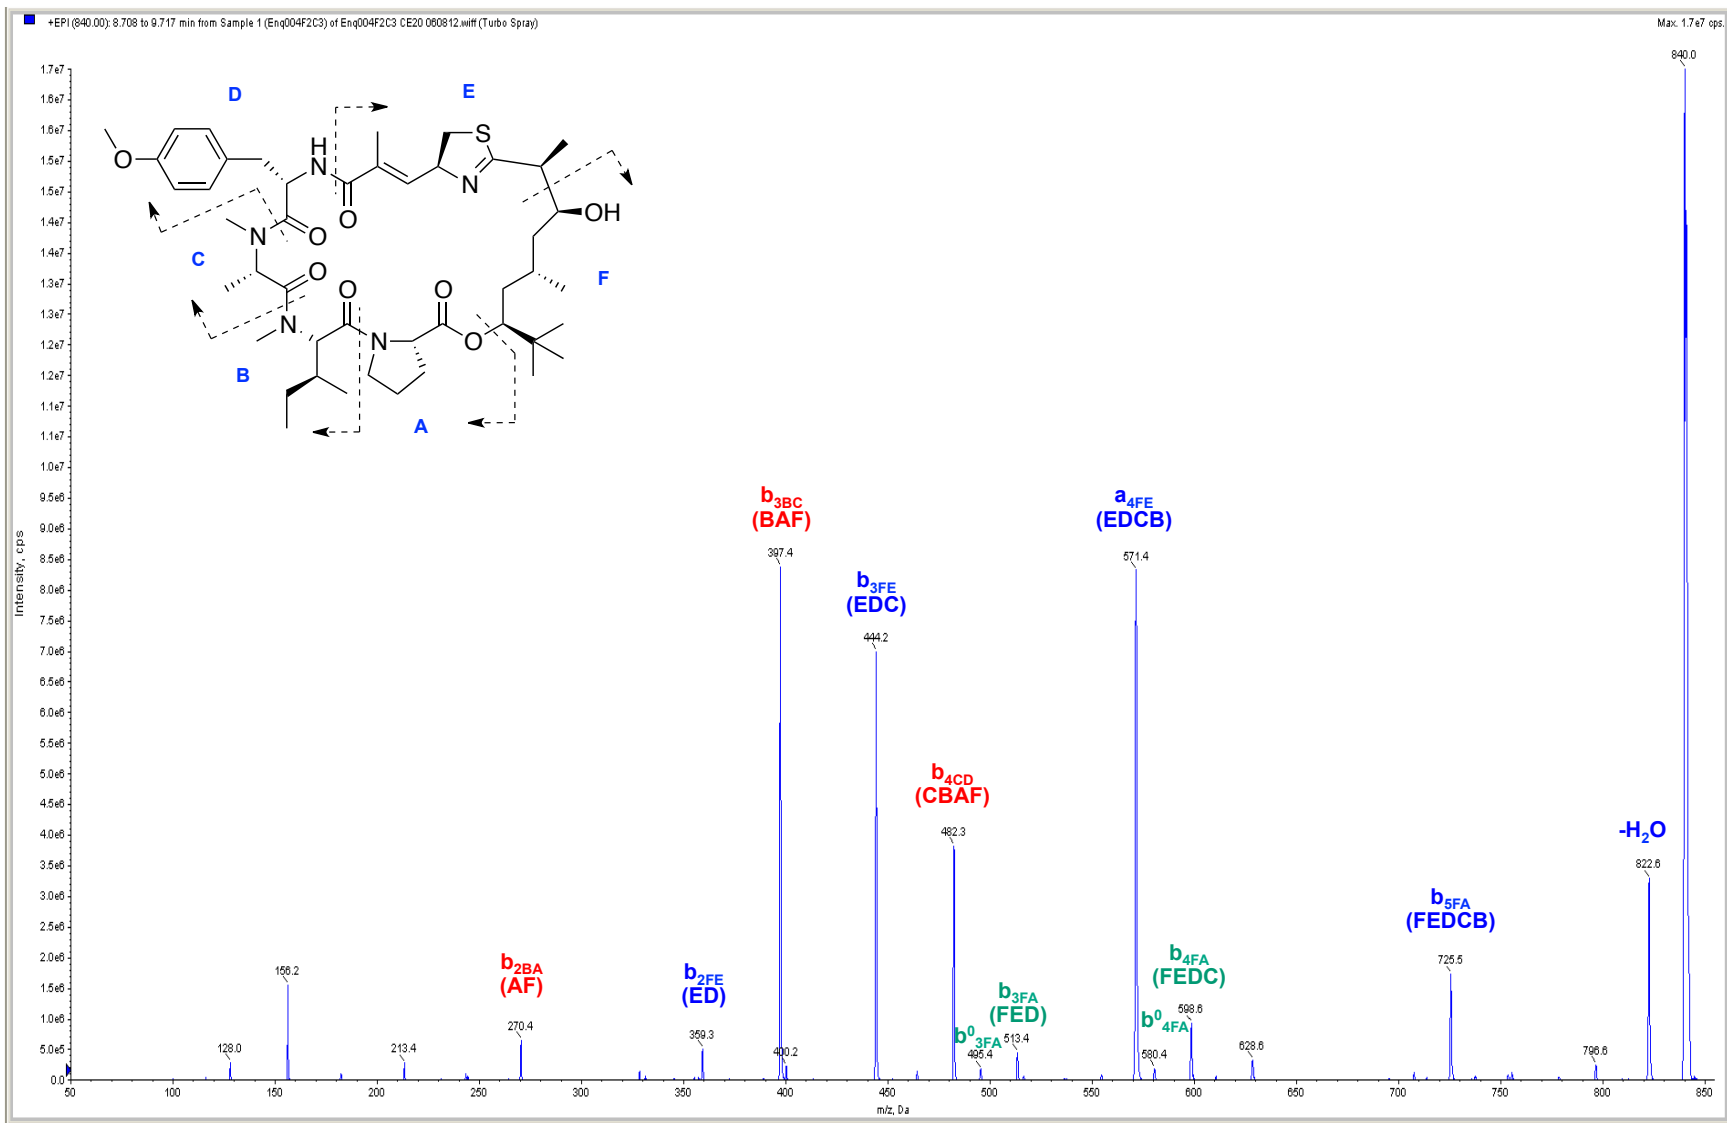

S17. Annotated MS/MS spectrum of apratoxin A

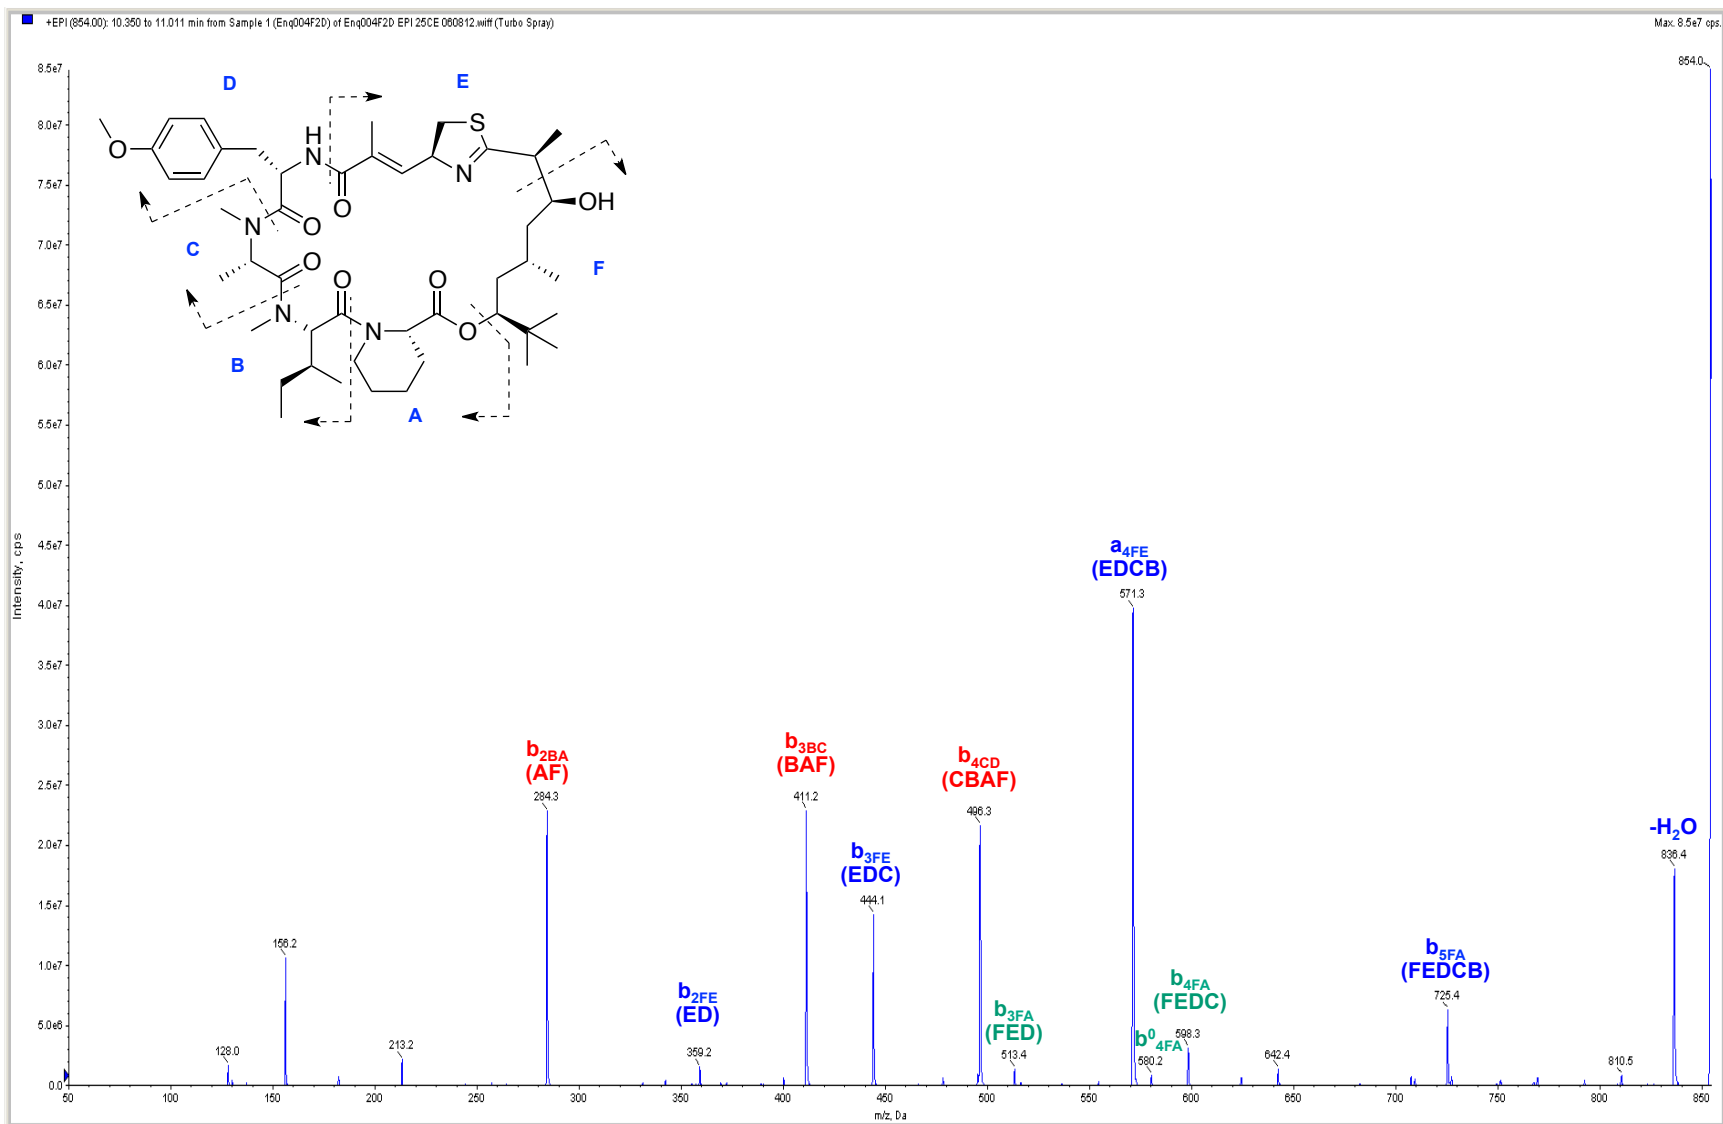

**S18.** Annotated MS/MS spectrum of apratoxin H (**1**)

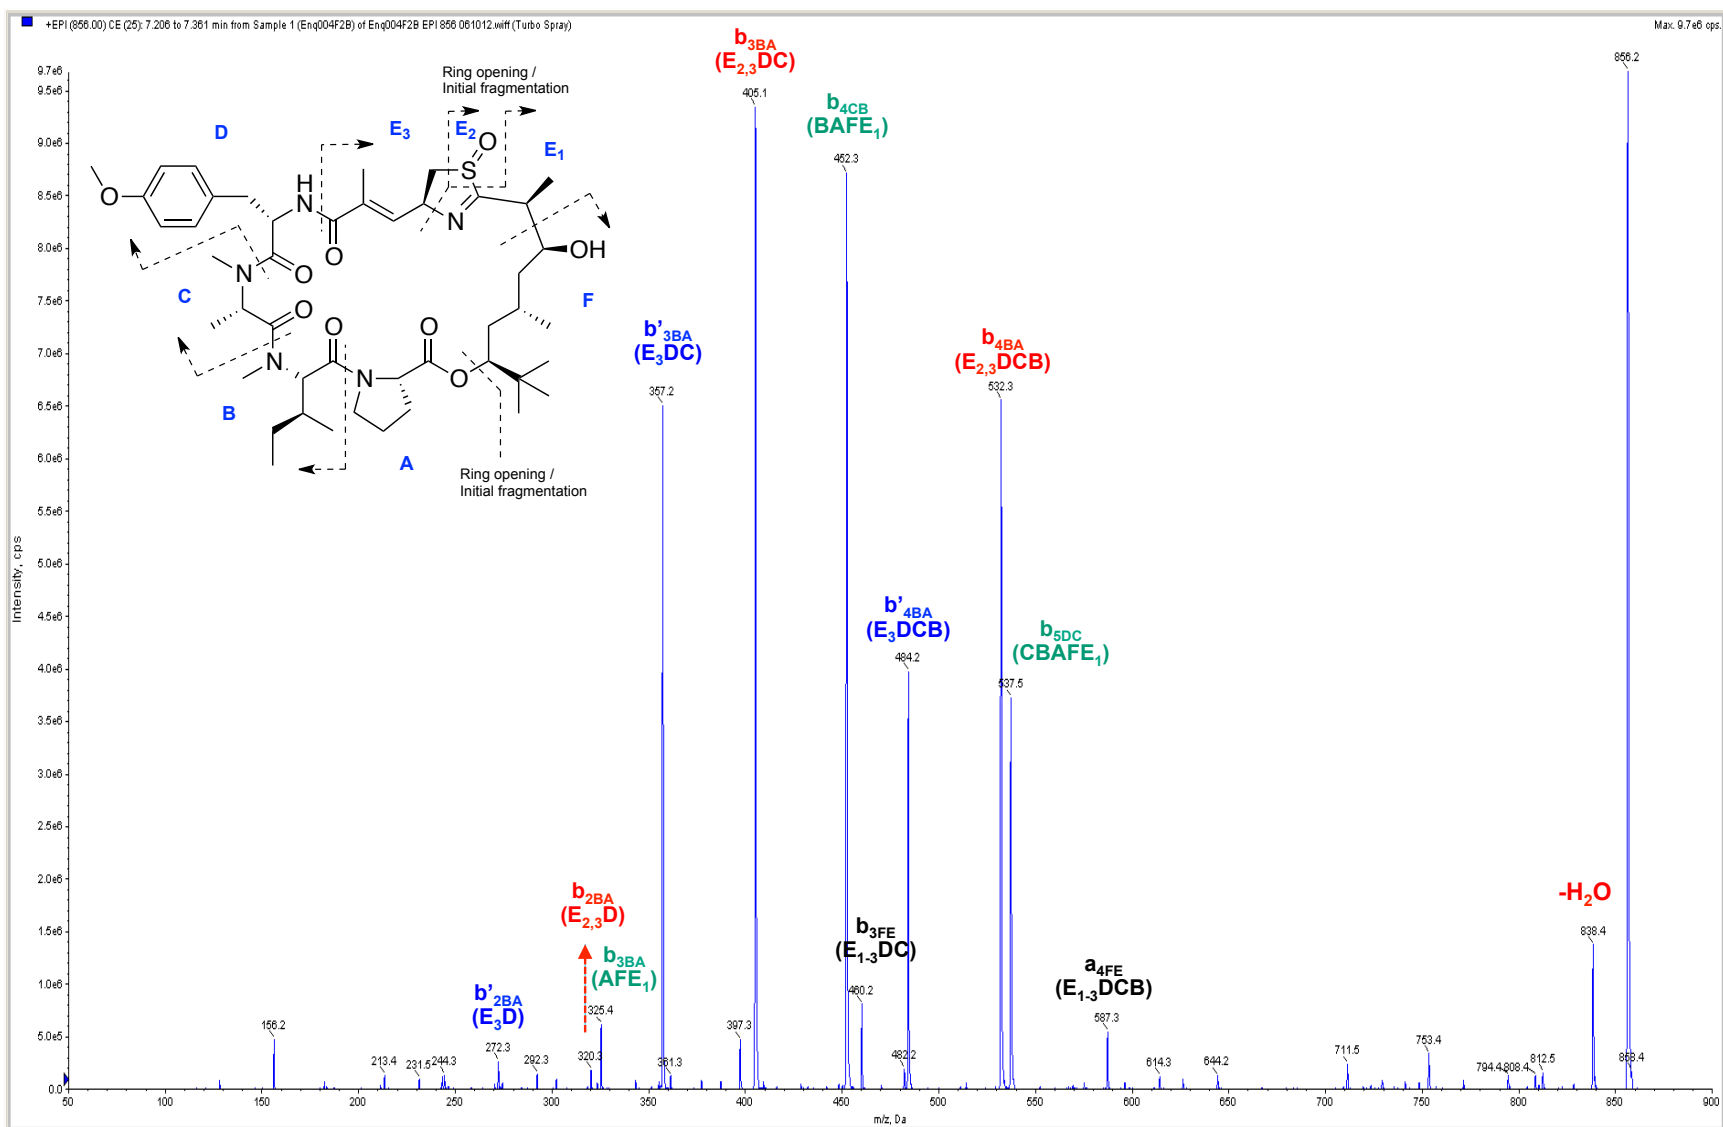

S19. Annotated MS/MS spectrum of apratoxin A sulfoxide (2)

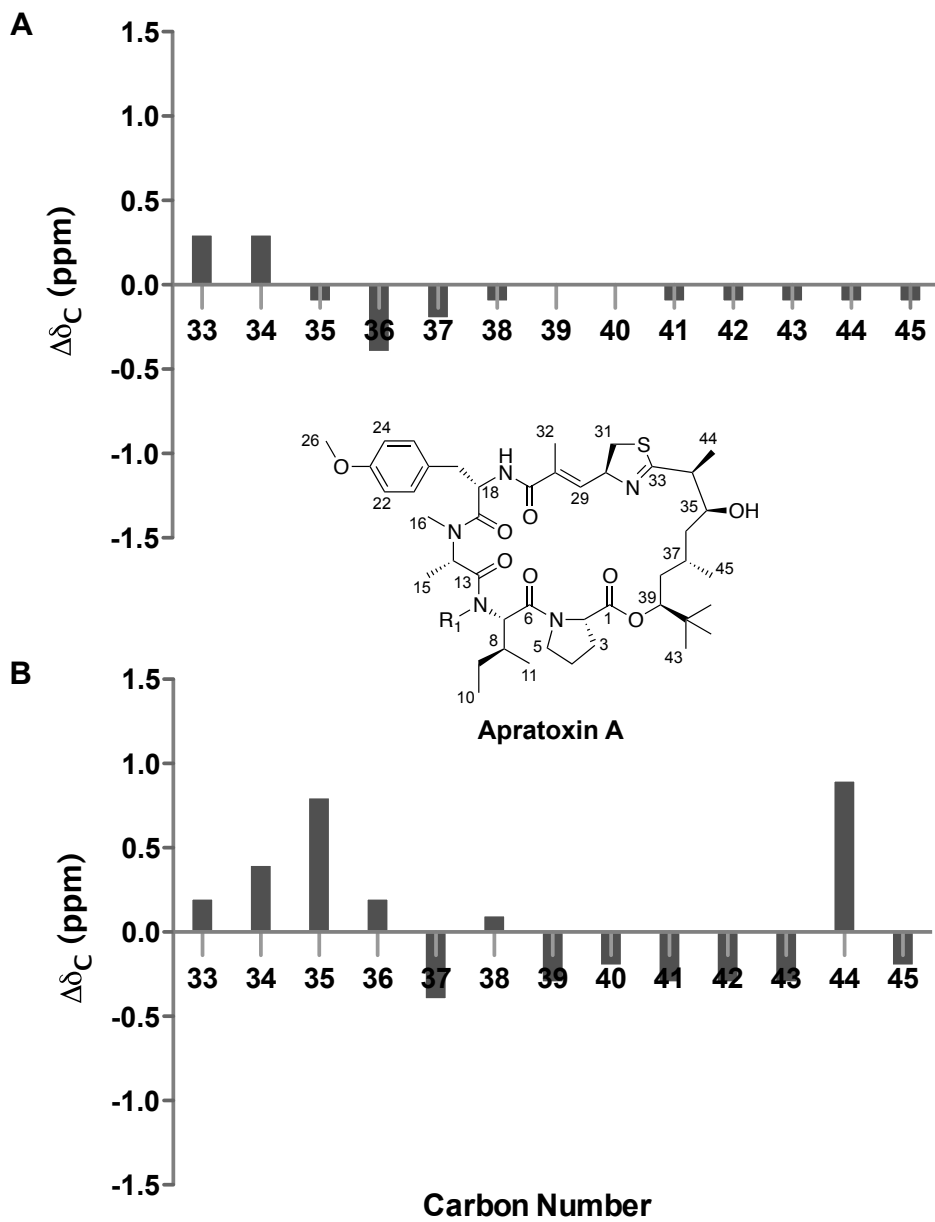

**S20.** Differential  $^{13}\text{C}$  NMR chemical shifts of the polyketide moiety in apratoxin A versus: A) apratoxin H (**1**), and B) apratoxin A sulfoxide (**2**).

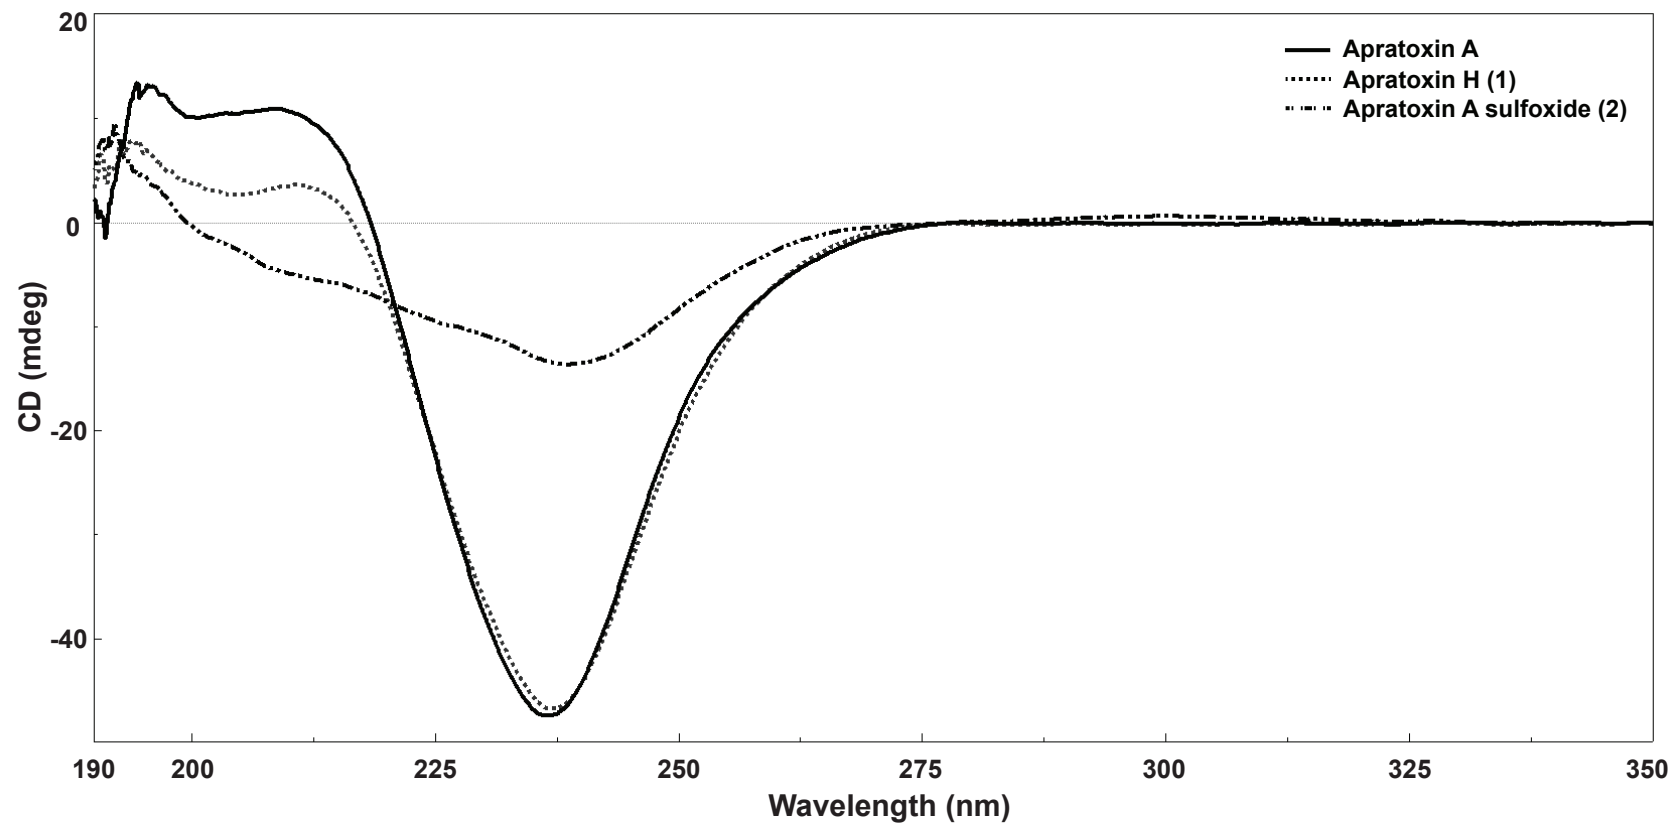

S21. CD spectra for apratoxins A, H (1) and apratoxin A sulfoxide (2).

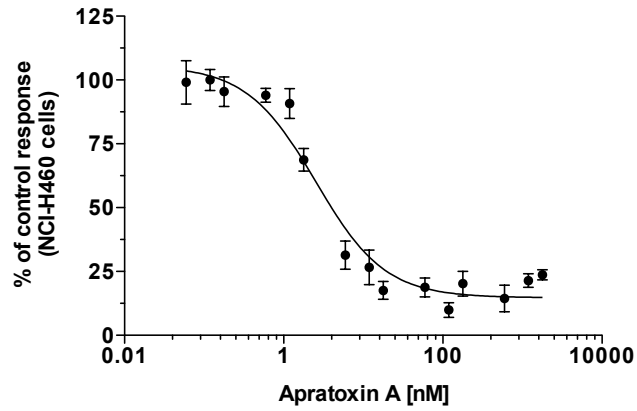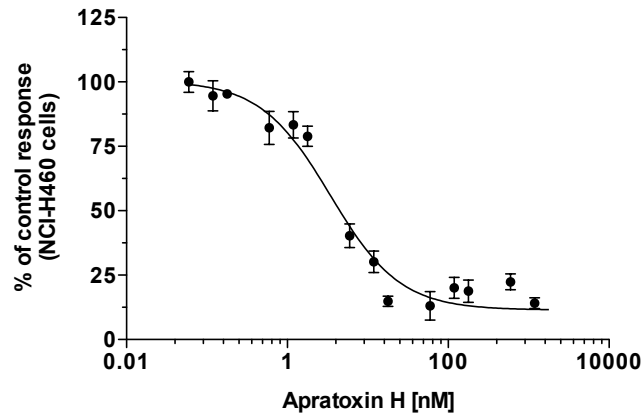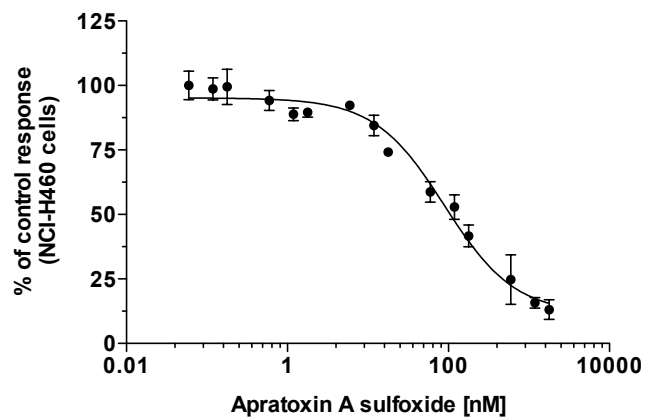

**S22.** Concentration-response profiles for apratoxin A, apratoxin H (1) and apratoxin A sulfoxide (2) against human NCI-H460 lung cancer cells. Cell viability was assessed after 48 hours using a colorimetric MTT cell viability. Data represent mean cell viability  $\pm$  S.E. (n = 3) with the viability of vehicle-treated cells defined as 100 %.



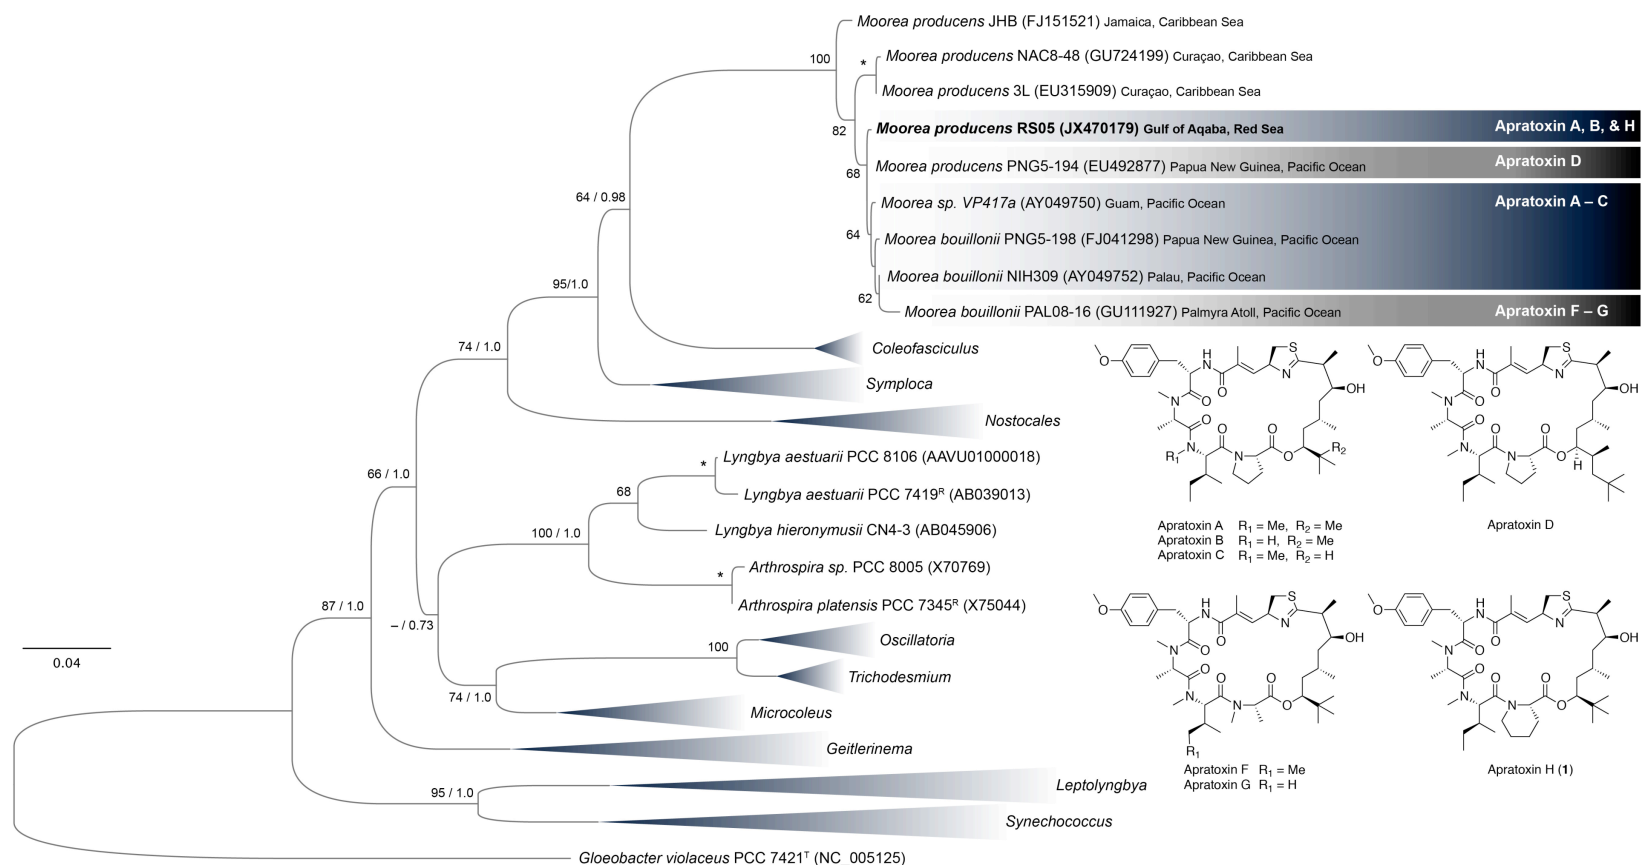

**S23.** Phylogenetic relationship of the apratoxin-producing cyanobacteria with other marine filamentous cyanobacteria based on SSU (16S) rRNA gene sequences. Labels on the terminal nodes indicate the taxa, strain, GenBank accession numbers in parenthesis, and collection sites for relevant strains. Reference (<sup>R</sup>) or type strains (<sup>T</sup>) are included within each cyanobacterial group. The support values at important nodes are indicated as bootstrap and posterior probability for the maximum-likelihood (PhyML) and Bayesian inference (MrBayes) methods (\* = bootstrap of > 98% and a posterior probability of 1.0). Support values < 60 are not indicated. The scale bar indicates 0.04 expected nucleotide substitutions per site.

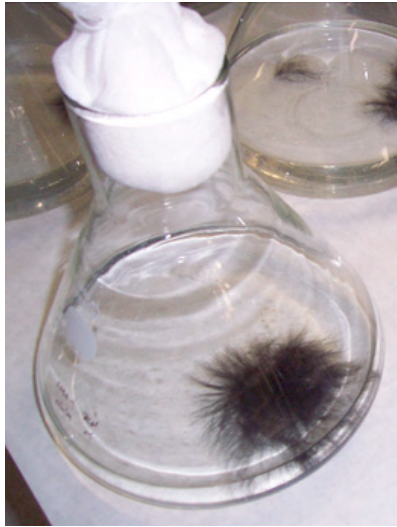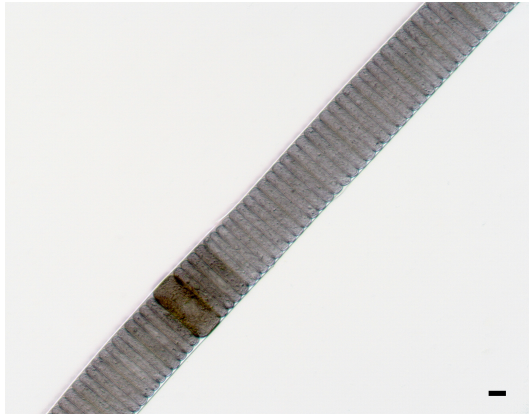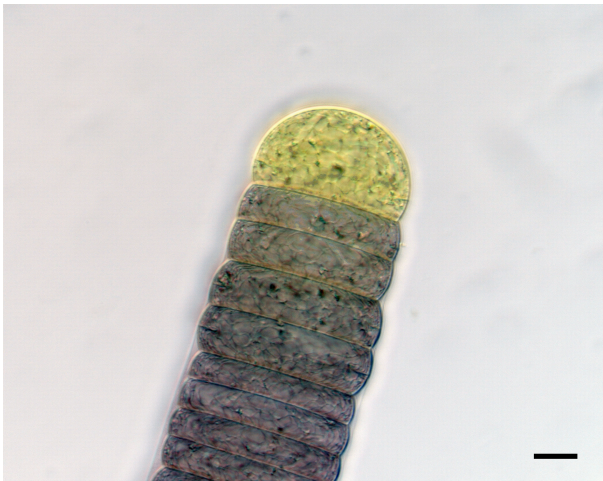

**S24.** Laboratory cultured *Moorea* sp. RS05 (JX470179) and corresponding photomicrographs (x400 and x1000, respectively). Scale bar = 10  $\mu\text{m}$ .
